# Supplementary material for: In Vitro, In Silico, and In Vivo Studies of Cardamine hirsuta Linn as a Potential Antidiabetic Agent in a Rat Model
Source: PubMed Central journal article supplement — ACS Omega. 2023 Jun 12;8(25):22623–36. doi: 10.1021/acsomega.3c01034 (PMC10308569; doi:10.1021/acsomega.3c01034), 2023-06-12
Supplement: ao3c01034_si_001.pdf [file ao3c01034_si_001.pdf]

Original Article

***In-vitro, in-silico, and in-vivo studies of Cardamine hirsuta Linn as potential antidiabetic agent in a rat model***

Aqna Malik<sup>1</sup>, Ali Sharif<sup>\*2</sup>, Hafiz Muhammad Zubair<sup>3</sup>, Bushra Akhtar<sup>4</sup>, Aisha Mobashar<sup>5</sup>

1. Department of Pharmacology, Faculty of Pharmacy, The University of Lahore, 54000 Pakistan  
[insharahbatool@yahoo.com](mailto:insharahbatool@yahoo.com)
2. Department of Pharmacology, Faculty of Pharmacy, The University of Lahore, 54000 Pakistan  
[alisharif.pharmacist@gmail.com](mailto:alisharif.pharmacist@gmail.com), 0345-7440663
3. Department of Pharmacology, Faculty of Pharmacy, The University of Lahore, 54000, Pakistan  
[Muhhammad.zubair@pharm.uol.edu.pk](mailto:Muhhammad.zubair@pharm.uol.edu.pk)
4. Department of Pharmacy, University of Agriculture Faisalabad, 38000, Pakistan  
[bushra.akhtar7@hotmail.com](mailto:bushra.akhtar7@hotmail.com)
5. Department of Pharmacology, Faculty of Pharmacy, The University of Lahore, 54000 Pakistan  
[aishamobashar@gmail.com](mailto:aishamobashar@gmail.com)

**\*Corresponding author**

Ali Sharif

Department of Pharmacology

Faculty of Pharmacy, University of Lahore, Lahore

54000, Pakistan;

**Present Address:**

Department Of Pharmacology, Institute of Pharmacy,

Faculty of Pharmaceutical and Allied Health Sciences,

Lahore College for Women University, Lahore 54000,

Pakistan; Phone: +92 345 744 066 3

Email: [alisharif.pharmacist@gmail.com](mailto:alisharif.pharmacist@gmail.com)

**Table S1. *In vitro* Antioxidant DPPH assay**

| Sr No. | Concentration( $\mu\text{g}/\text{mL}$ ) | Ascorbic acid %age inhibition | Hydro-methanolic extract %age inhibition |
|--------|------------------------------------------|-------------------------------|------------------------------------------|
| 1      | 1000.0                                   | 70.09                         | 60.08                                    |
| 2      | 500.0                                    | 64.09                         | 55.09                                    |
| 3      | 250.0                                    | 53.02                         | 54.09                                    |
| 4      | 125.0                                    | 50.05                         | 49.05                                    |
| 5      | 62.5                                     | 51.08                         | 49.09                                    |
| 6      | 32.0                                     | 50.04                         | 49.08                                    |

**Table S2. Alpha-amylase inhibitory assay:**

| Sr No. | Concentration( $\mu\text{g}/\text{mL}$ ) | Alpha amylase %age inhibition | Hydro-methanolic extract %age inhibition |
|--------|------------------------------------------|-------------------------------|------------------------------------------|
| 1      | 0.                                       | 14.280000                     | 12.160000                                |
| 2      | 10.                                      | 18.180000                     | 18.290000                                |
| 3      | 20.                                      | 25.900000                     | 28.510000                                |
| 4      | 40.                                      | 36.060000                     | 44.420000                                |
| 5      | 60.                                      | 52.350000                     | 61.460000                                |
| 6      | 80.                                      | 70.800000                     | 82.434300                                |

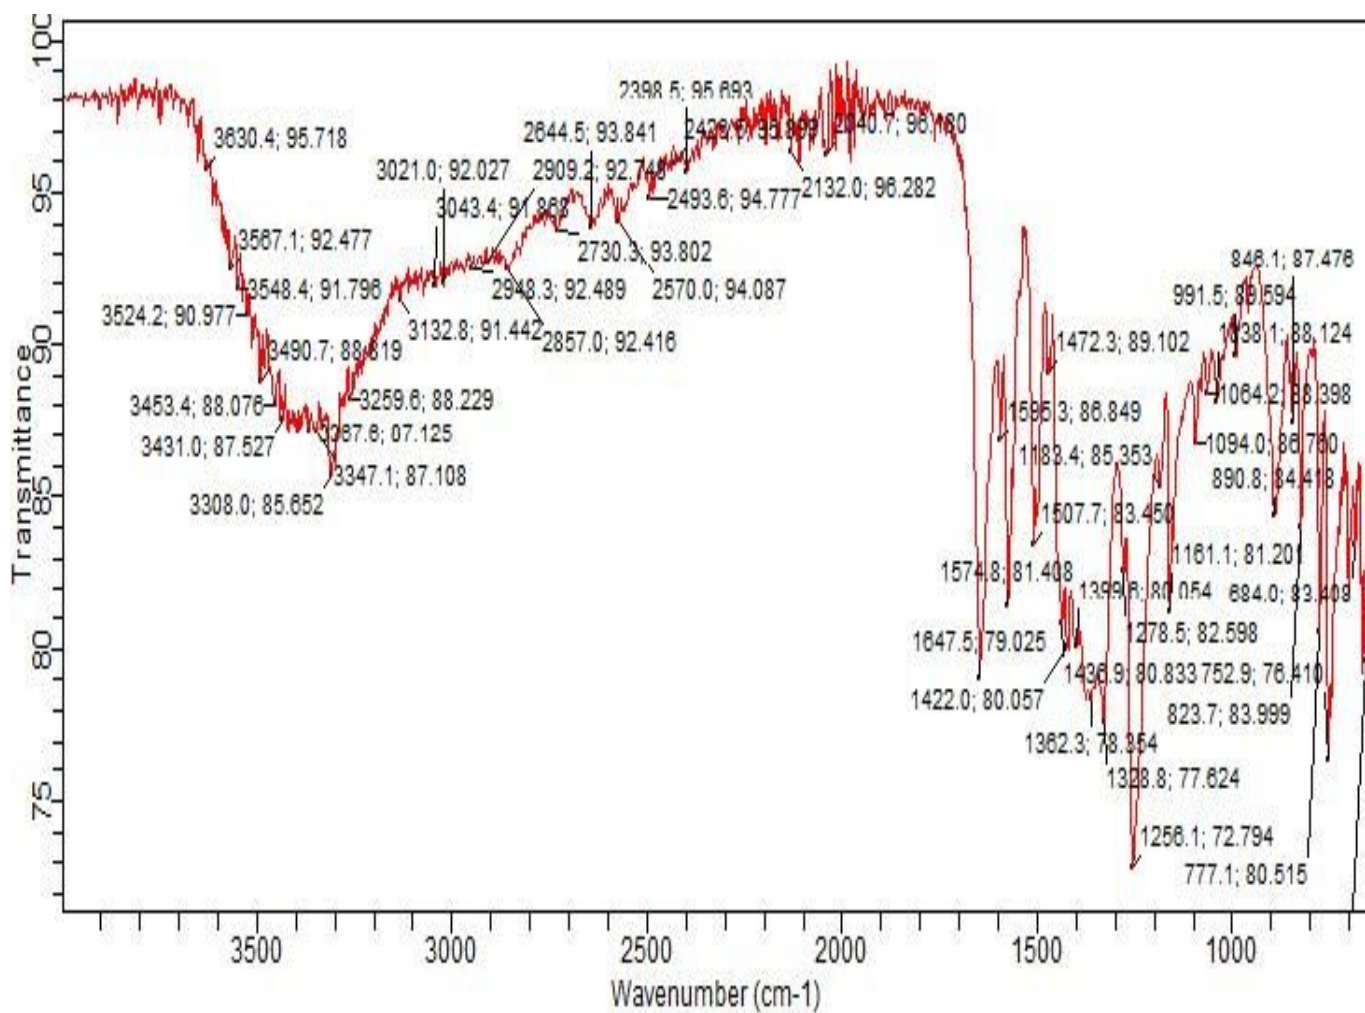

**Figure S1. Fourier-Transform Infrared Spectroscopy (FTIR) Analysis**

**Table S3. Drug-likeness properties analyses of top 3 phytocompounds.**

| Properties | Mulberrofuran M | Quercetin-3-(6 <sup>''</sup> -caffeoylsophoroside) |
|------------|-----------------|----------------------------------------------------|
| Mass       | 590.5299        | 788.6567                                           |
| LogP       | 6.7570          | -1.0392                                            |
| HBA        | 10              | 20                                                 |
| HBD        | 4               | 12                                                 |
| PSA        | 159.8000        | 336.1900                                           |
| RO5        | 2               | 3                                                  |
| Atoms      | 66              | 92                                                 |
| Rings      | 8               | 6                                                  |

**Table S4. Water intake ml/day/100g**

| <b>DAY 0</b>                                     | <b>NC</b>   | <b>HFD-STZ</b> | <b>HFD-STD</b> | <b>HFD-STZ<br/>500mg/kg</b> | <b>HFD-STZ<br/>250mg/kg</b> | <b>HFD-STZ<br/>125mg/kg</b> |
|--------------------------------------------------|-------------|----------------|----------------|-----------------------------|-----------------------------|-----------------------------|
|                                                  | 8.55        | 9              | 6.225          | 7.44                        | 8                           | 8                           |
|                                                  | 6.15        | 11.05          | 6.525          | 7.44                        | 10.08                       | 6.24                        |
|                                                  | 4.725       | 11.62          | 6.48           | 6                           | 10.62                       | 6.56                        |
|                                                  | 4.35        | 10.5           | 5.6            | 6.64                        | 11.52                       | 8.55                        |
|                                                  | 5.25        | 14.25          | 7.68           | 7.68                        | 11.8                        | 9.09                        |
| <b>Mean</b>                                      | <b>5.81</b> | <b>11.3</b>    | <b>6.5</b>     | <b>7.04</b>                 | <b>10.4</b>                 | <b>7.69</b>                 |
| <b>Std.<br/>Deviation</b>                        | <b>1.68</b> | <b>1.92</b>    | <b>0.755</b>   | <b>0.702</b>                | <b>1.51</b>                 | <b>1.24</b>                 |
| <b>Std. Error<br/>of Mean</b>                    | <b>0.75</b> | <b>0.86</b>    | <b>0.338</b>   | <b>0.314</b>                | <b>0.675</b>                | <b>0.556</b>                |
| <b>DAY 30th<br/>before<br/>STZ<br/>induction</b> | <b>NC</b>   | <b>HFD-STZ</b> | <b>HFD-STD</b> | <b>HFD-STZ<br/>500mg/kg</b> | <b>HFD-STZ<br/>250mg/kg</b> | <b>HFD-STZ<br/>125mg/kg</b> |
|                                                  | 8.775       | 10.2           | 8.25           | 10.08                       | 12.6                        | 9.9                         |

|                                                                                             |              |                |                |                         |                         |                         |
|---------------------------------------------------------------------------------------------|--------------|----------------|----------------|-------------------------|-------------------------|-------------------------|
|                                                                                             | 6.75         | 12.35          | 8.175          | 12                      | 11.88                   | 9.075                   |
|                                                                                             | 6.3          | 14.42          | 8.56           | 11.36                   | 12.5                    | 8.25                    |
|                                                                                             | 4.875        | 15             | 8              | 10.24                   | 13.7                    | 8.8                     |
|                                                                                             | 4.5          | 15.75          | 9.12           | 10.4                    | 13                      | 8.88                    |
| <b>Mean</b>                                                                                 | <b>6.24</b>  | <b>13.5</b>    | <b>8.42</b>    | <b>10.8</b>             | <b>12.7</b>             | <b>8.98</b>             |
| <b>Std. Deviation</b>                                                                       | <b>1.7</b>   | <b>2.26</b>    | <b>0.44</b>    | <b>0.828</b>            | <b>0.672</b>            | <b>0.598</b>            |
| <b>Std. Error of Mean</b>                                                                   | <b>0.761</b> | <b>1.01</b>    | <b>0.197</b>   | <b>0.37</b>             | <b>0.3</b>              | <b>0.267</b>            |
| <b>Day 32<sup>th</sup> (Day 3<sup>rd</sup>) post STZ induction</b>                          | <b>NC</b>    | <b>HFD-STZ</b> | <b>HFD-STD</b> | <b>HFD-STZ 500mg/kg</b> | <b>HFD-STZ 250mg/kg</b> | <b>HFD-STZ 125mg/kg</b> |
|                                                                                             | 9.45         | 16.8           | 13.5           | 15.52                   | 18.9                    | 17.46                   |
|                                                                                             | 7.875        | 17.55          | 13.95          | 15.84                   | 19                      | 17.28                   |
|                                                                                             | 7.8          | 16.8           | 15.04          | 15.92                   | 17.5                    | 15.36                   |
|                                                                                             | 7.875        | 18             | 14.08          | 15.84                   | 18                      | 16.48                   |
|                                                                                             | 5.025        | 16.8           | 15.2           | 16.8                    | 13.6                    | 18.72                   |
| <b>Mean</b>                                                                                 | <b>7.61</b>  | <b>17.2</b>    | <b>14.4</b>    | <b>16</b>               | <b>17.4</b>             | <b>17.1</b>             |
| <b>Std. Deviation</b>                                                                       | <b>1.6</b>   | <b>0.557</b>   | <b>0.734</b>   | <b>0.481</b>            | <b>2.21</b>             | <b>1.24</b>             |
| <b>Std. Error of Mean</b>                                                                   | <b>0.716</b> | <b>0.249</b>   | <b>0.328</b>   | <b>0.215</b>            | <b>0.99</b>             | <b>0.556</b>            |
| <b>Day 47<sup>th</sup> (Day 15<sup>th</sup>) post STZ&amp; during treatment with hydro-</b> | <b>NC</b>    | <b>HFD-STZ</b> | <b>HFD-STD</b> | <b>HFD-STZ 500mg/kg</b> | <b>HFD-STZ 250mg/kg</b> | <b>HFD-STZ 125mg/kg</b> |

|                                                                       |              |                |                |                             |                             |                             |
|-----------------------------------------------------------------------|--------------|----------------|----------------|-----------------------------|-----------------------------|-----------------------------|
| <b>methanolic<br/>extract<br/>of<br/><i>Cardamine<br/>Hirsuta</i></b> |              |                |                |                             |                             |                             |
|                                                                       | 10.125       | 14.4           | 18.075         | 15.6                        | 19                          | 18.72                       |
|                                                                       | 9            | 14.43          | 16.65          | 15.44                       | 19.3                        | 21.4                        |
|                                                                       | 8.925        | 15.4           | 18             | 14.96                       | 18                          | 18.1                        |
|                                                                       | 8.4          | 16.35          | 19.2           | 16.08                       | 18.5                        | 18.54                       |
|                                                                       | 5.625        | 15             | 20.64          | 16                          | 18.5                        | 16.8                        |
| <b>Mean</b>                                                           | <b>8.42</b>  | <b>15.1</b>    | <b>18.5</b>    | <b>15.6</b>                 | <b>18.7</b>                 | <b>18.7</b>                 |
| <b>Std.<br/>Deviation</b>                                             | <b>1.68</b>  | <b>0.806</b>   | <b>1.49</b>    | <b>0.454</b>                | <b>0.503</b>                | <b>1.68</b>                 |
| <b>Std. Error<br/>of Mean</b>                                         | <b>0.752</b> | <b>0.361</b>   | <b>0.668</b>   | <b>0.203</b>                | <b>0.225</b>                | <b>0.751</b>                |
| <b>Day 60th</b>                                                       | <b>NC</b>    | <b>HFD-STZ</b> | <b>HFD-STD</b> | <b>HFD-STZ<br/>500mg/kg</b> | <b>HFD-STZ<br/>250mg/kg</b> | <b>HFD-STZ<br/>125mg/kg</b> |
|                                                                       | 12           | 22.32          | 20.925         | 22.41                       | 23.5                        | 22                          |
|                                                                       | 10.125       | 26             | 20.775         | 22.5                        | 22.2                        | 21.4                        |
|                                                                       | 10.5         | 27.3           | 21.28          | 22.59                       | 22                          | 23.3                        |
|                                                                       | 9.375        | 16.2           | 22.16          | 20.52                       | 22                          | 21.4                        |
|                                                                       | 6.75         | 22.8           | 22.96          | 21.15                       | 17.84                       | 21.8                        |
| <b>Mean</b>                                                           | <b>9.75</b>  | <b>22.9</b>    | <b>21.6</b>    | <b>21.8</b>                 | <b>21.5</b>                 | <b>22</b>                   |
| <b>Std.<br/>Deviation</b>                                             | <b>1.93</b>  | <b>4.31</b>    | <b>0.922</b>   | <b>0.941</b>                | <b>2.14</b>                 | <b>0.782</b>                |
| <b>Std. Error<br/>of Mean</b>                                         | <b>0.863</b> | <b>1.93</b>    | <b>0.412</b>   | <b>0.421</b>                | <b>0.959</b>                | <b>0.35</b>                 |

**Table S5. Fasting Blood Glucose (FBG) mg/dl**

| Groups                    | DAY 0        | Animals on HFD-Diet |                     | Day 0 STZ Induction | Day 3 STZ Induction | During hydro-methanolic extract of Cardamine Hirsuta treatment |                     |
|---------------------------|--------------|---------------------|---------------------|---------------------|---------------------|----------------------------------------------------------------|---------------------|
|                           |              | DaY 1 HFD-Diet      | DAY30 <sup>th</sup> | DAY31 <sup>st</sup> | DAY32 <sup>nd</sup> | Day 47th (Day 15th) post STZ                                   | DAY60 <sup>th</sup> |
| HFD-STD                   |              |                     |                     |                     |                     |                                                                |                     |
| <b>R1</b>                 | 111          | 111                 | 116                 | 118                 | 227                 | 129                                                            | 85                  |
| <b>R2</b>                 | 90           | 92                  | 93                  | 100                 | 475                 | 125                                                            | 85                  |
| <b>R3</b>                 | 110          | 119                 | 122                 | 130                 | 459                 | 257                                                            | 75                  |
| <b>R4</b>                 | 118          | 117                 | 116                 | 120                 | 475                 | 125                                                            | 82                  |
| <b>R5</b>                 | 113          | 114                 | 113                 | <b>125</b>          | 460                 | 200                                                            | 97                  |
| <b>Mean</b>               | <b>108</b>   | <b>111</b>          | <b>112</b>          | <b>119</b>          | <b>419</b>          | <b>167</b>                                                     | 84.8                |
| <b>Std. Deviation</b>     | <b>10.7</b>  | <b>10.8</b>         | <b>11.1</b>         | <b>11.4</b>         | <b>108</b>          | <b>59.5</b>                                                    | 7.95                |
| <b>Std. Error of Mean</b> | <b>4.8</b>   | <b>4.84</b>         | <b>4.97</b>         | <b>5.1</b>          | <b>48.2</b>         | <b>26.6</b>                                                    | 3.56                |
| HFD-STZ-125mg/kg          |              |                     |                     |                     |                     |                                                                |                     |
| <b>R1</b>                 | 112          | 112                 | 111                 | 120                 | 274                 | 126                                                            | 83                  |
| <b>R2</b>                 | 114          | 114                 | 113                 | 123                 | 309                 | 328                                                            | 97                  |
| <b>R3</b>                 | 115          | 115                 | 116                 | 118                 | 352                 | 325                                                            | 127                 |
| <b>R4</b>                 | 110          | 110                 | 112                 | 125                 | 108                 | 176                                                            | 99                  |
| <b>R5</b>                 | 111          | 110                 | 115                 | 130                 | 458                 | 325                                                            | 205                 |
| <b>Mean</b>               | <b>112.4</b> | <b>112.2</b>        | <b>113.4</b>        | <b>123</b>          | <b>300</b>          | <b>256</b>                                                     | <b>122</b>          |
| <b>Std. Deviation</b>     | <b>2.074</b> | <b>2.28</b>         | <b>2.074</b>        | <b>4.66</b>         | <b>128</b>          | <b>97.5</b>                                                    | <b>49</b>           |

|                           |               |             |               |             |             |             |             |
|---------------------------|---------------|-------------|---------------|-------------|-------------|-------------|-------------|
| <b>Std. Error of Mean</b> | <b>0.9274</b> | <b>1.02</b> | <b>0.9274</b> | <b>2.08</b> | <b>57.1</b> | <b>43.6</b> | <b>21.9</b> |
| <b>HFD-STZ-250mg/kg</b>   |               |             |               |             |             |             |             |
| <b>R1</b>                 | 111           | 111         | 110           | 123         | 225         | 166         | 85          |
| <b>R2</b>                 | 120           | 120         | 122           | 130         | 411         | 115         | 87          |
| <b>R3</b>                 | 117           | 117         | 118           | 126         | 325         | 133         | 85          |
| <b>R4</b>                 | 118           | 119         | 119           | 127         | 456         | 414         | 120         |
| <b>R5</b>                 | 115           | 115         | 115           | 131         | 450         | 300         | 85          |
| <b>Mean</b>               | <b>116</b>    | <b>116</b>  | <b>117</b>    | <b>127</b>  | <b>373</b>  | <b>226</b>  | <b>92.4</b> |
| <b>Std. Deviation</b>     | <b>3.42</b>   | <b>3.58</b> | <b>4.55</b>   | <b>3.21</b> | <b>98.1</b> | <b>128</b>  | <b>15.5</b> |
| <b>Std. Error of Mean</b> | <b>1.53</b>   | <b>1.6</b>  | <b>2.03</b>   | <b>1.44</b> | <b>43.9</b> | <b>57.2</b> | <b>6.91</b> |
| <b>HFD-STZ-500mg/kg</b>   |               |             |               |             |             |             |             |
| <b>R1</b>                 | 105           | 105         | 106           | 122         | 220         | 113         | 79          |
| <b>R2</b>                 | 99            | 99          | 100           | 119         | 221         | 83          | 75          |
| <b>R3</b>                 | 97            | 97          | 99            | 115         | 205         | 103         | 74          |
| <b>R4</b>                 | 114           | 112         | 113           | 120         | 356         | 90          | 73          |
| <b>R5</b>                 | 111           | 111         | 112           | 119         | 325         | 109         | 70          |
| <b>Mean</b>               | <b>105</b>    | <b>105</b>  | <b>106</b>    | <b>119</b>  | <b>265</b>  | <b>99.6</b> | <b>74.2</b> |
| <b>Std. Deviation</b>     | <b>7.36</b>   | <b>6.8</b>  | <b>6.52</b>   | <b>2.55</b> | <b>69.7</b> | <b>12.7</b> | <b>3.27</b> |
| <b>Std. Error of Mean</b> | <b>3.29</b>   | <b>3.04</b> | <b>2.92</b>   | <b>1.14</b> | <b>31.2</b> | <b>5.69</b> | <b>1.46</b> |



|                           |             |             |             |             |             |             |             |
|---------------------------|-------------|-------------|-------------|-------------|-------------|-------------|-------------|
| <b>HFD-STZ</b>            |             |             |             |             |             |             |             |
| <b>R1</b>                 | 112         | 112         | 111         | 115         | 434         | 455         | 480         |
| <b>R2</b>                 | 114         | 114         | 115         | 125         | 426         | 425         | 500         |
| <b>R3</b>                 | 115         | 115         | 117         | 130         | 429         | 478         | 478         |
| <b>R4</b>                 | 110         | 110         | 112         | 129         | 466         | 420         | 452         |
| <b>R5</b>                 | 109         | 108         | 105         | 132         | 489         | 412         | 430         |
| <b>Mean</b>               | <b>112</b>  | <b>112</b>  | <b>112</b>  | <b>126</b>  | <b>449</b>  | <b>438</b>  | <b>468</b>  |
| <b>Std. Deviation</b>     | <b>2.55</b> | <b>2.86</b> | <b>4.58</b> | <b>6.76</b> | <b>27.6</b> | <b>27.6</b> | <b>27.2</b> |
| <b>Std. Error of Mean</b> | <b>1.14</b> | <b>1.28</b> | <b>2.05</b> | <b>3.02</b> | <b>12.3</b> | <b>12.4</b> | <b>12.2</b> |
| <b>NC</b>                 |             |             |             |             |             |             |             |
| <b>R1</b>                 | 102         | 102         | 103         | 84          | 102         | 102         | 101         |
| <b>R2</b>                 | 105         | 105         | 102         | 105         | 105         | 104         | 72          |
| <b>R3</b>                 | 91          | 91          | 94          | 91          | 88          | 91          | 104         |
| <b>R4</b>                 | 112         | 112         | 113         | 112         | 112         | 112         | 105         |
| <b>R5</b>                 | 110         | 110         | 114         | 110         | 110         | 79          | 116         |
| <b>Mean</b>               | <b>104</b>  | <b>104</b>  | <b>105</b>  | <b>100</b>  | <b>103</b>  | <b>97.6</b> | <b>99.6</b> |
| <b>Std. Deviation</b>     | <b>8.28</b> | <b>8.28</b> | <b>8.35</b> | <b>12.3</b> | <b>9.48</b> | <b>12.8</b> | <b>16.4</b> |
| <b>Std. Error of Mean</b> | <b>3.7</b>  | <b>3.7</b>  | <b>3.73</b> | <b>5.5</b>  | <b>4.24</b> | <b>5.73</b> | <b>7.35</b> |

**Table S6. Fasting Insulin  $\mu$ U/ ml**

|                                                 | <b>GROUPS</b>              |                |                |                         |                         |                         |
|-------------------------------------------------|----------------------------|----------------|----------------|-------------------------|-------------------------|-------------------------|
| <b>DAY 0</b>                                    | <b>NC</b>                  | <b>HFD-STZ</b> | <b>HFD-STD</b> | <b>HFD-STZ-500mg/kg</b> | <b>HFD-STZ-250mg/kg</b> | <b>HFD-STZ-125mg/kg</b> |
| <b>R1</b>                                       | 22.38                      | 19.4           | 16.3           | 17.9                    | 15.3                    | 15.3                    |
| <b>R2</b>                                       | 23                         | 18.5           | 17.7           | 18.3                    | 20.7                    | 22.7                    |
| <b>R3</b>                                       | 21                         | 19.6           | 15.2           | 16.5                    | 20.2                    | 21.2                    |
| <b>R4</b>                                       | 22.9                       | 17.3           | 15.5           | 20.6                    | 22.5                    | 21.5                    |
| <b>R5</b>                                       | 21.5                       | 16.5           | 16.6           | 15.7                    | 20.6                    | 20.6                    |
| <b>Mean</b>                                     | <b>22.2</b>                | <b>18.3</b>    | <b>16.3</b>    | <b>17.8</b>             | <b>19.9</b>             | <b>20.3</b>             |
| <b>Std. Deviation</b>                           | <b>0.878</b>               | <b>1.34</b>    | <b>0.986</b>   | <b>1.88</b>             | <b>2.7</b>              | <b>2.88</b>             |
| <b>Std. Error of Mean</b>                       | <b>0.393</b>               | <b>0.599</b>   | <b>0.441</b>   | <b>0.843</b>            | <b>1.21</b>             | <b>1.29</b>             |
| <b>DAY 30<sup>th</sup> Before STZ induction</b> | <b>Animals on HFD-Diet</b> |                |                |                         |                         |                         |
| <b>R1</b>                                       | 22.38                      | 62.05          | 61.02          | 63.2                    | 65                      | 71.4                    |
| <b>R2</b>                                       | 23                         | 80.021         | 79.04          | 74                      | 79.2                    | 75.6                    |
| <b>R3</b>                                       | 21                         | 78.04          | 75.01          | 75.02                   | 78.02                   | 73.2                    |
| <b>R4</b>                                       | 22.9                       | 65.2           | 69.2           | 76.2                    | 74.02                   | 71.2                    |
| <b>R5</b>                                       | 21.5                       | 79.02          | 71.4           | 76.3                    | 74.3                    | 74.5                    |
| <b>Mean</b>                                     | <b>22.2</b>                | <b>72.9</b>    | <b>71.1</b>    | <b>72.9</b>             | <b>74.1</b>             | <b>73.2</b>             |
| <b>Std. Deviation</b>                           | <b>0.878</b>               | <b>8.54</b>    | <b>6.78</b>    | <b>5.53</b>             | <b>5.57</b>             | <b>1.92</b>             |
| <b>Std. Error of Mean</b>                       | <b>0.393</b>               | <b>3.82</b>    | <b>3.03</b>    | <b>2.47</b>             | <b>2.49</b>             | <b>0.857</b>            |
| <b>DAY32nd 3rd day post STZ induction</b>       |                            |                |                |                         |                         |                         |
| <b>R1</b>                                       | 21                         | 13.4           | 12.3           | 11.9                    | 10.3                    | 15.3                    |
| <b>R2</b>                                       | 23                         | 12.5           | 13.7           | 11.3                    | 10.7                    | 14.7                    |
| <b>R3</b>                                       | 20                         | 14.6           | 14.2           | 11.5                    | 10.2                    | 13.2                    |
| <b>R4</b>                                       | 22.9                       | 13.3           | 15.5           | 11.6                    | 10.5                    | 11.5                    |
| <b>R5</b>                                       | 20                         | 12.5           | 16.6           | 11.7                    | 10.6                    | 10.6                    |

|                           |              |              |               |              |               |              |
|---------------------------|--------------|--------------|---------------|--------------|---------------|--------------|
| <b>Mean</b>               | <b>21.4</b>  | <b>13.3</b>  | <b>14.5</b>   | <b>11.6</b>  | <b>10.5</b>   | <b>13.1</b>  |
| <b>Std. Deviation</b>     | <b>1.49</b>  | <b>0.862</b> | <b>1.66</b>   | <b>0.224</b> | <b>0.207</b>  | <b>2.01</b>  |
| <b>Std. Error of Mean</b> | <b>0.667</b> | <b>0.385</b> | <b>0.741</b>  | <b>0.1</b>   | <b>0.0927</b> | <b>0.9</b>   |
| DAY 60th                  |              |              |               |              |               |              |
| <b>R1</b>                 | 21.27        | 6.45         | 12.8          | 13.29        | 12.2          | 8.21         |
| <b>R2</b>                 | 19.2         | 6.54         | 12.6          | 14.9         | 11.9          | 8.3          |
| <b>R3</b>                 | 20.3         | 6.55         | 13.8          | 14.8         | 10            | 8.2          |
| <b>R4</b>                 | 20.6         | 6.9          | 14            | 15.4         | 12.5          | 8.9          |
| <b>R5</b>                 | 18.5         | 6.3          | 12.7          | 13.9         | 12.9          | 8.5          |
| <b>Mean</b>               | <b>19</b>    | <b>6.55</b>  | <b>13.2</b>   | <b>14.5</b>  | <b>11.9</b>   | <b>8.42</b>  |
| <b>Std. Deviation</b>     | <b>0.817</b> | <b>0.665</b> | <b>0.221</b>  | <b>0.848</b> | <b>1.12</b>   | <b>0.293</b> |
| <b>Std. Error of Mean</b> | <b>0.365</b> | <b>0.297</b> | <b>0.0988</b> | <b>0.379</b> | <b>0.503</b>  | <b>0.131</b> |

**Table S7. Hemoglobin A1C (HbA1C%)**

| <b>HbA1C%</b>             | <b>NC</b>   | <b>HFD-STZ</b> | <b>HFD-STD</b> | <b>HFD-<br/>500mg/kg</b> | <b>HFD-<br/>250mg/kg</b> | <b>HFD-<br/>125mg/kg</b> |
|---------------------------|-------------|----------------|----------------|--------------------------|--------------------------|--------------------------|
| <b>R1</b>                 | 6.43        | 14.73          | 7.32           | 8.6                      | 8.6                      | 14.76                    |
| <b>R2</b>                 | 4.33        | 15.6           | 7.65           | 10.2                     | 13.2                     | 14.7                     |
| <b>R3</b>                 | 4.32        | 15.7           | 7.33           | 11.4                     | 13.3                     | 13                       |
| <b>R4</b>                 | 4.31        | 15.2           | 8.2            | 9.4                      | 13                       | 13.1                     |
| <b>R5</b>                 | 6.37        | 15.9           | 8.1            | 8.2                      | 13.7                     | 13.4                     |
| <b>Mean</b>               | <b>5.15</b> | <b>15.4</b>    | <b>7.72</b>    | <b>9.56</b>              | <b>12.4</b>              | <b>13.8</b>              |
| <b>Std.Dev</b>            | <b>1.14</b> | <b>0.465</b>   | <b>0.416</b>   | <b>1.28</b>              | <b>2.12</b>              | <b>0.869</b>             |
| <b>Std. Error of Mean</b> | <b>0.51</b> | <b>0.186</b>   | <b>0.208</b>   | <b>0.574</b>             | <b>0.947</b>             | <b>0.389</b>             |

Biochemical analysis

Table S8. Lipid Profile

| Triglycerides<br>(mg/dL)                             | NC          | HFD-<br>STZ  | HFD-<br>STD  | HFD-STZ<br>CH<br>500mg/kg | HFD-STZ CH<br>250mg/kg | HFD-STZ<br>CH<br>125mg/kg |
|------------------------------------------------------|-------------|--------------|--------------|---------------------------|------------------------|---------------------------|
| R1                                                   | 21.5        | 173          | 43.2         | 45.3                      | 46.3                   | 48.9                      |
| R2                                                   | 36.76       | 156.3        | 44.5         | 45.9                      | 46.5                   | 47.9                      |
| R3                                                   | 29.3        | 170.2        | 40.3         | 44.3                      | 46                     | 47.3                      |
| R4                                                   | 35.2        | 172.5        | 41.1         | 44.2                      | 45.9                   | 47.2                      |
| R5                                                   | 40.2        | 169.8        | 42.5         | 43.6                      | 47.6                   | 46.5                      |
| <b>Mean</b>                                          | <b>32.6</b> | <b>168</b>   | <b>42.3</b>  | <b>44.7</b>               | <b>46.5</b>            | <b>47.6</b>               |
| <b>Std. Deviation</b>                                | <b>7.35</b> | <b>6.88</b>  | <b>1.67</b>  | <b>0.924</b>              | <b>0.68</b>            | <b>0.899</b>              |
| <b>Std. Error of<br/>Mean</b>                        | <b>3.29</b> | <b>3.08</b>  | <b>0.746</b> | <b>0.413</b>              | <b>0.304</b>           | <b>0.402</b>              |
| <b>Total Cholesterol<br/>(TC)</b>                    |             |              |              |                           |                        |                           |
| R1                                                   | 72.7        | 186.7        | 82.87        | 109.4                     | 115.4                  | 119.4                     |
| R2                                                   | 79.92       | 187.7        | 83.2         | 110.2                     | 116.2                  | 120.2                     |
| R3                                                   | 78.2        | 185.9        | 80.1         | 111.3                     | 117.3                  | 118.3                     |
| R4                                                   | 70.2        | 186.3        | 81.2         | 112.4                     | 114.4                  | 120.4                     |
| R5                                                   | 75.3        | 188.7        | 81.5         | 100.2                     | 114.2                  | 118.2                     |
| <b>Mean</b>                                          | <b>75.3</b> | <b>187</b>   | <b>81.8</b>  | <b>109</b>                | <b>116</b>             | <b>119</b>                |
| <b>Std. Deviation</b>                                | <b>3.95</b> | <b>1.13</b>  | <b>1.27</b>  | <b>4.88</b>               | <b>1.29</b>            | <b>1.03</b>               |
| <b>Std. Error of<br/>Mean</b>                        | <b>1.77</b> | <b>0.508</b> | <b>0.568</b> | <b>2.18</b>               | <b>0.576</b>           | <b>0.46</b>               |
| <b>High Density<br/>Lipoproteins HDL<br/>(mg/dL)</b> |             |              |              |                           |                        |                           |
| R1                                                   | 38.69       | 26           | 39.8         | 36.5                      | 32.89                  | 28.2                      |
| R2                                                   | 42.7        | 27           | 37.5         | 37.9                      | 33.76                  | 29.2                      |
| R3                                                   | 43.7        | 25.3         | 39.9         | 36.5                      | 32.9                   | 30.5                      |

|                                             |              |              |              |              |              |              |
|---------------------------------------------|--------------|--------------|--------------|--------------|--------------|--------------|
| <b>R4</b>                                   | 40.2         | 24.9         | 38.5         | 35.5         | 32.5         | 29.9         |
| <b>R5</b>                                   | 39.7         | 23.7         | 38.4         | 35.9         | 32.1         | 27.5         |
| <b>Mean</b>                                 | <b>41</b>    | <b>25.4</b>  | <b>38.8</b>  | <b>36.5</b>  | <b>32.8</b>  | <b>29.1</b>  |
| <b>Std. Deviation</b>                       | <b>2.11</b>  | <b>1.23</b>  | <b>1.02</b>  | <b>0.91</b>  | <b>0.615</b> | <b>1.22</b>  |
| <b>Std. Error of Mean</b>                   | <b>0.945</b> | <b>0.551</b> | <b>0.455</b> | <b>0.407</b> | <b>0.275</b> | <b>0.546</b> |
| <b>Low Density Lipoproteins LDL (mg/dL)</b> |              |              |              |              |              |              |
| <b>R1</b>                                   | 16.8         | 126.7        | 38.35        | 40.78        | 48.7         | 50.9         |
| <b>R2</b>                                   | 13.76        | 96.4         | 38.2         | 39.8         | 47.6         | 49.7         |
| <b>R3</b>                                   | 20.7         | 120.9        | 37.6         | 38.5         | 44.5         | 50.2         |
| <b>R4</b>                                   | 24.8         | 119          | 37.9         | 40.2         | 45.3         | 49.3         |
| <b>R5</b>                                   | 23.7         | 98.7         | 37.2         | 39.9         | 46.7         | 48.4         |
| <b>Mean</b>                                 | <b>20</b>    | <b>112</b>   | <b>37.9</b>  | <b>39.8</b>  | <b>46.6</b>  | <b>49.7</b>  |
| <b>Std. Deviation</b>                       | <b>4.65</b>  | <b>13.8</b>  | <b>0.464</b> | <b>0.839</b> | <b>1.7</b>   | <b>0.941</b> |
| <b>Std. Error of Mean</b>                   | <b>2.08</b>  | <b>6.18</b>  | <b>0.207</b> | <b>0.375</b> | <b>0.759</b> | <b>0.421</b> |
| <b>Very Low Lipoproteins VLDL (mg/dL)</b>   |              |              |              |              |              |              |
| <b>R1</b>                                   | 27.76        | 34           | 24.76        | 26.9         | 30.9         | 32.3         |
| <b>R2</b>                                   | 27.79        | 35.4         | 23.5         | 25.9         | 29.8         | 32.7         |
| <b>R3</b>                                   | 27.4         | 34.2         | 24           | 26.3         | 29.4         | 31.9         |
| <b>R4</b>                                   | 26.9         | 35.2         | 24.7         | 26.1         | 30.7         | 33.4         |
| <b>R5</b>                                   | 26.5         | 33.1         | 23.9         | 25.9         | 29.4         | 32.9         |
| <b>Mean</b>                                 | <b>27.3</b>  | <b>34.4</b>  | <b>24.2</b>  | <b>26.2</b>  | <b>30</b>    | <b>32.6</b>  |
| <b>Std. Deviation</b>                       | <b>0.561</b> | <b>0.939</b> | <b>0.543</b> | <b>0.415</b> | <b>0.716</b> | <b>0.573</b> |
| <b>Std. Error of Mean</b>                   | <b>0.251</b> | <b>0.42</b>  | <b>0.243</b> | <b>0.185</b> | <b>0.32</b>  | <b>0.256</b> |

**Table S9. Liver Function Tests (LFTs)**

| <b>ALT (U/L)</b>          | <b>NC</b>   | <b>HFD-STZ</b> | <b>HFD-STD</b> | <b>HFD-500mg/kg</b> | <b>HFD-250mg/kg</b> | <b>HFD-125mg/kg</b> |
|---------------------------|-------------|----------------|----------------|---------------------|---------------------|---------------------|
| <b>R1</b>                 | 14.2        | 20.9           | 117            | 22.8                | 25.3                | 28.2                |
| <b>R2</b>                 | 17.2        | 21.2           | 117            | 23.5                | 25.4                | 29.6                |
| <b>R3</b>                 | 10.3        | 22.4           | 119            | 23.8                | 26.3                | 28.5                |
| <b>R4</b>                 | 19.3        | 21.9           | 116            | 24.9                | 24.2                | 29.6                |
| <b>R5</b>                 | 20.2        | 20.1           | 115            | 23.4                | 23.2                | 28.7                |
| <b>Mean</b>               | <b>16.2</b> | <b>21.3</b>    | <b>117</b>     | <b>23.7</b>         | <b>24.9</b>         | <b>28.9</b>         |
| <b>Std. Deviation</b>     | <b>4.04</b> | <b>0.892</b>   | <b>1.48</b>    | <b>0.773</b>        | <b>1.2</b>          | <b>0.646</b>        |
| <b>Std. Error of Mean</b> | <b>1.81</b> | <b>0.399</b>   | <b>0.663</b>   | <b>0.346</b>        | <b>0.536</b>        | <b>0.289</b>        |
| <b>ALP (U/L)</b>          |             |                |                |                     |                     |                     |
| <b>R1</b>                 | 83          | 87             | 247            | 85.4                | 90.5                | 120.5               |
| <b>R2</b>                 | 79.6        | 89.6           | 322.7          | 81.4                | 96.2                | 127.9               |
| <b>R3</b>                 | 78.9        | 106.7          | 386            | 80.6                | 90.5                | 115.2               |
| <b>R4</b>                 | 88.5        | 119.7          | 355.7          | 90.4                | 95.2                | 120.6               |
| <b>R5</b>                 | 85.3        | 116.7          | 267.5          | 90.5                | 94.5                | 124.6               |
| <b>Mean</b>               | <b>83.1</b> | <b>104</b>     | <b>316</b>     | <b>85.7</b>         | <b>93.4</b>         | <b>122</b>          |
| <b>Std. Deviation</b>     | <b>4</b>    | <b>15.1</b>    | <b>58.4</b>    | <b>4.74</b>         | <b>2.7</b>          | <b>4.79</b>         |
| <b>Std. Error of Mean</b> | <b>1.79</b> | <b>6.75</b>    | <b>26.1</b>    | <b>2.12</b>         | <b>1.21</b>         | <b>2.14</b>         |
| <b>AST (U/L)</b>          |             |                |                |                     |                     |                     |
| <b>R1</b>                 | 59.7        | 65.8           | 235            | 66.9                | 67.8                | 79.5                |
| <b>R2</b>                 | 59.8        | 71.9           | 165.7          | 72.2                | 74.3                | 77.6                |
| <b>R3</b>                 | 55.2        | 70.2           | 145.7          | 74.9                | 75                  | 79.5                |
| <b>R4</b>                 | 65.5        | 69.3           | 155.6          | 70.5                | 74.3                | 78.6                |
| <b>R5</b>                 | 54.3        | 60.9           | 125.6          | 69.7                | 71.2                | 77.4                |
| <b>Mean</b>               | <b>58.9</b> | <b>67.6</b>    | <b>166</b>     | <b>70.8</b>         | <b>72.5</b>         | <b>78.5</b>         |
| <b>Std. Deviation</b>     | <b>4.47</b> | <b>4.37</b>    | <b>41.6</b>    | <b>2.97</b>         | <b>3.02</b>         | <b>1</b>            |

|                           |          |             |             |             |             |              |
|---------------------------|----------|-------------|-------------|-------------|-------------|--------------|
| <b>Std. Error of Mean</b> | <b>2</b> | <b>1.95</b> | <b>18.6</b> | <b>1.33</b> | <b>1.35</b> | <b>0.449</b> |
|---------------------------|----------|-------------|-------------|-------------|-------------|--------------|

**Table S10. Serum Urea and Creatinine (mg/dl).**



| <b>Serum Urea<br/>(mg/dl)</b>           | <b>NC</b>      | <b>HFD-<br/>STZ</b> | <b>HFD-<br/>STD</b> | <b>HFD-STZ CH<br/>500mg/kg</b> | <b>HFD-STZ<br/>CH<br/>250mg/kg</b> | <b>HFD-STZ CH<br/>125mg/kg</b> |
|-----------------------------------------|----------------|---------------------|---------------------|--------------------------------|------------------------------------|--------------------------------|
| <b>R1</b>                               | 26.1           | 65                  | 30.1                | 35.4                           | 40.5                               | 45.9                           |
| <b>R2</b>                               | 20.21          | 78                  | 30.2                | 36.7                           | 41.5                               | 44.5                           |
| <b>R3</b>                               | 23.7           | 79                  | 31.5                | 38.9                           | 42.4                               | 46                             |
| <b>R4</b>                               | 23.2           | 80                  | 32.6                | 37.2                           | 41.5                               | 45.9                           |
| <b>R5</b>                               | 25.3           | 50                  | 35.6                | 36.9                           | 41                                 | 44.8                           |
| <b>Mean</b>                             | <b>23.7</b>    | <b>70.4</b>         | <b>32</b>           | <b>37</b>                      | <b>41.4</b>                        | <b>45.4</b>                    |
| <b>Std.Dev</b>                          | <b>2.28</b>    | <b>12.9</b>         | <b>2.26</b>         | <b>1.26</b>                    | <b>0.705</b>                       | <b>0.712</b>                   |
| <b>Std. Error of<br/>Mean</b>           | <b>1.02</b>    | <b>5.78</b>         | <b>1.01</b>         | <b>0.562</b>                   | <b>0.315</b>                       | <b>0.318</b>                   |
| <b>Serum<br/>Creatinine<br/>(mg/dl)</b> |                |                     |                     |                                |                                    |                                |
| <b>R1</b>                               | 0.4            | 0.67                | 0.43                | 0.49                           | 0.5                                | 0.53                           |
| <b>R2</b>                               | 0.41           | 0.75                | 0.43                | 0.48                           | 0.55                               | 0.54                           |
| <b>R3</b>                               | 0.42           | 0.69                | 0.44                | 0.47                           | 0.51                               | 0.52                           |
| <b>R4</b>                               | 0.42           | 0.63                | 0.45                | 0.46                           | 0.52                               | 0.54                           |
| <b>R5</b>                               | 0.41           | 0.76                | 0.42                | 0.45                           | 0.5                                | 0.53                           |
| <b>Mean</b>                             | <b>0.412</b>   | <b>0.7</b>          | <b>0.434</b>        | <b>0.47</b>                    | <b>0.516</b>                       | <b>0.532</b>                   |
| <b>Std.Dev</b>                          | <b>0.00837</b> | <b>0.0548</b>       | <b>0.0114</b>       | <b>0.0158</b>                  | <b>0.0207</b>                      | <b>0.00837</b>                 |
| <b>Std. Error of<br/>Mean</b>           | <b>0.00374</b> | <b>0.0245</b>       | <b>0.0051</b>       | <b>0.00707</b>                 | <b>0.00927</b>                     | <b>0.00374</b>                 |

**Table S11.Liver and Muscle Glycogen (mg/g)**

| <b>Liver Glycogen<br/>(mg/g)</b>      | <b>NC</b>    | <b>HFD-STD</b> | <b>HFD-STZ</b> | <b>HFD-<br/>500mg/kg</b> | <b>HFD-<br/>250mg/kg</b> | <b>HFD-<br/>125mg/kg</b> |
|---------------------------------------|--------------|----------------|----------------|--------------------------|--------------------------|--------------------------|
| R1                                    | 16.126       | 11.18          | 10.17          | 10                       | 9.5                      | 7.591                    |
| R2                                    | <b>17.18</b> | 11.09          | 10.15          | 9.8                      | 9.6                      | 7.5                      |
| R3                                    | 17           | 16.98          | 15.12          | 10.5                     | 9.3                      | 7.4                      |
| R4                                    | 16.98        | 14.96          | 10.15          | 10.6                     | 9.25                     | 6.98                     |
| R5                                    | 16.99        | 12.9           | 10.99          | 10.67                    | 9.1                      | 7.34                     |
| <b>Mean</b>                           | <b>16.9</b>  | <b>13.4</b>    | <b>7.36</b>    | <b>11.3</b>              | <b>10.3</b>              | <b>9.35</b>              |
| <b>Std. Deviation</b>                 | <b>0.416</b> | <b>2.54</b>    | <b>0.234</b>   | <b>2.16</b>              | <b>0.389</b>             | <b>0.2</b>               |
| <b>Std. Error of<br/>Mean</b>         | <b>0.186</b> | <b>1.13</b>    | <b>0.105</b>   | <b>0.965</b>             | <b>0.174</b>             | <b>0.0894</b>            |
| <b>Muscle<br/>Glycogen<br/>(mg/g)</b> |              |                |                |                          |                          |                          |
| R1                                    | 1.51         | 0.9783         | 0.439          | 0.5                      | 0.6854                   | 0.01                     |
| R2                                    | <b>1.52</b>  | 1              | 0.534          | 0.4                      | 0.98                     | 0.1                      |
| R3                                    | 1            | 1              | 0.675          | 0.3                      | 0.76                     | 0.2                      |
| R4                                    | 0.99         | 0.976          | 0.345          | 0.34                     | 0.96                     | 0.1                      |
| R5                                    | 0.98         | 0.943          | 0.234          | 0.2                      | 0.91                     | 0.09                     |
| <b>Mean</b>                           | <b>1.2</b>   | <b>0.979</b>   | <b>0.1</b>     | <b>0.348</b>             | <b>0.859</b>             | <b>0.445</b>             |
| <b>Std. Deviation</b>                 | <b>0.288</b> | <b>0.0234</b>  | <b>0.0675</b>  | <b>0.112</b>             | <b>0.13</b>              | <b>0.17</b>              |
| <b>Std. Error of<br/>Mean</b>         | <b>0.129</b> | <b>0.0105</b>  | <b>0.0302</b>  | <b>0.05</b>              | <b>0.058</b>             | <b>0.076</b>             |

The relative weight of organs (liver, pancreas, and kidney)

Table S12. Relative Weight of Organs (liver, pancreas, and kidney)

| Tissue                    | Groups       |                |                |                     |                     |                     |
|---------------------------|--------------|----------------|----------------|---------------------|---------------------|---------------------|
| <b>Pancreas (g)</b>       | <b>NC</b>    | <b>HFD-STD</b> | <b>HFD-STZ</b> | <b>HFD-500mg/kg</b> | <b>HFD-250mg/kg</b> | <b>HFD-125mg/kg</b> |
| R1                        | 1.5          | 0.8            | 0.45           | 0.66                | 0.66                | 0.59                |
| R2                        | <b>1.57</b>  | 0.89           | 0.46           | 0.69                | 0.7                 | 0.6                 |
| R3                        | 1.45         | 0.99           | 0.5            | 0.67                | 0.61                | 0.61                |
| R4                        | 1.05         | 0.87           | 0.51           | 0.68                | 0.63                | 0.59                |
| R5                        | 1.02         | 0.92           | 0.48           | 0.65                | 0.62                | 0.58                |
| <b>Mean</b>               | <b>1.32</b>  | <b>0.894</b>   | <b>0.48</b>    | <b>0.692</b>        | <b>0.644</b>        | <b>0.594</b>        |
| <b>Std. Deviation</b>     | <b>0.262</b> | <b>0.0695</b>  | <b>0.0255</b>  | <b>0.0421</b>       | <b>0.0365</b>       | <b>0.0114</b>       |
| <b>Std. Error of Mean</b> | <b>0.117</b> | <b>0.0311</b>  | <b>0.0114</b>  | <b>0.0188</b>       | <b>0.0163</b>       | <b>0.0051</b>       |
| <b>Liver (g)</b>          | <b>NC</b>    | <b>HFD-STD</b> | <b>HFD-STZ</b> | <b>HFD-500mg/kg</b> | <b>HFD-250mg/kg</b> | <b>HFD-125mg/kg</b> |
| R1                        | 12.43        | 12.44          | 7.45           | 11.37               | 11.9                | 11.82               |
| R2                        | 12.45        | 12.81          | 7.89           | 12.01               | 11.2                | 10.2                |
| R3                        | 13           | 12.05          | 7.99           | 12                  | 11.13               | 11                  |
| R4                        | 12.9         | 12.09          | 7.88           | 11.57               | 11.89               | 11                  |
| R5                        | 12.34        | 12.34          | 7.87           | 12.06               | 12.02               | 11.8                |
| <b>Mean</b>               | <b>12.6</b>  | <b>12.3</b>    | <b>7.82</b>    | <b>11.8</b>         | <b>11.6</b>         | <b>11.2</b>         |
| <b>Std. Deviation</b>     | <b>0.303</b> | <b>0.307</b>   | <b>0.21</b>    | <b>0.312</b>        | <b>0.426</b>        | <b>0.674</b>        |
| <b>Std. Error of Mean</b> | <b>0.135</b> | <b>0.137</b>   | <b>0.094</b>   | <b>0.14</b>         | <b>0.191</b>        | <b>0.301</b>        |
| <b>Kidney (g)</b>         | <b>NC</b>    | <b>HFD-STD</b> | <b>HFD-STZ</b> | <b>HFD-500mg/kg</b> | <b>HFD-250mg/kg</b> | <b>HFD-125mg/kg</b> |
| R1                        | 1.04         | 0.64           | 0.52           | <b>0.97</b>         | <b>0.91</b>         | <b>0.89</b>         |
| R2                        | 1.04         | <b>1.15</b>    | 0.59           | 1.02                | 0.89                | 0.76                |
| R3                        | 1.03         | 1.16           | 0.48           | 0.96                | 0.87                | 0.84                |

|                                    |                |                 |                 |                     |                     |                     |
|------------------------------------|----------------|-----------------|-----------------|---------------------|---------------------|---------------------|
| R4                                 | 1.09           | 1.16            | 0.53            | 1.04                | 0.84                | 0.83                |
| R5                                 | 1.08           | 1.07            | 0.68            | 0.96                | 0.9                 | 0.72                |
| <b>Mean</b>                        | <b>1.06</b>    | <b>1.04</b>     | <b>0.56</b>     | <b>0.99</b>         | <b>0.882</b>        | <b>0.808</b>        |
| <b>Std. Deviation</b>              | <b>0.027</b>   | <b>0.225</b>    | <b>0.0778</b>   | <b>0.0374</b>       | <b>0.0277</b>       | <b>0.0676</b>       |
| <b>Std. Error of Mean</b>          | <b>0.0121</b>  | <b>0.1</b>      | <b>0.0348</b>   | <b>0.0167</b>       | <b>0.0124</b>       | <b>0.0302</b>       |
| <b>Relative weight of Liver</b>    | <b>NC</b>      | <b>HFD-STD</b>  | <b>HFD-STZ</b>  | <b>HFD-500mg/kg</b> | <b>HFD-250mg/kg</b> | <b>HFD-125mg/kg</b> |
| R1                                 | 5.685          | 4.45519713      | 7.45            | 4.995983936         | 5.063829787         | 5.628571429         |
| R2                                 | 6.03517588     | 4.49458484      | 7.811881188     | 5.124               | 5.045045045         | 4.927536232         |
| R3                                 | 5.73762376     | 4.88721805      | 7.99            | 5.298804781         | 5.059090909         | 5.365853659         |
| R4                                 | 5.84343434     | 4.65703971      | 7.801980198     | 5.302631579         | 5.404545455         | 5.392156863         |
| R5                                 | 8.31724138     | 4.29965157      | 7.87            | 5.25106383          | 5.390134529         | 5.514018692         |
| <b>Mean</b>                        | <b>6.3237</b>  | <b>4.5587</b>   | <b>7.7848</b>   | <b>5.1945</b>       | <b>5.1925</b>       | <b>5.3656</b>       |
| <b>Std. Deviation</b>              | <b>1.1224</b>  | <b>0.22334</b>  | <b>0.20155</b>  | <b>0.13243</b>      | <b>0.18716</b>      | <b>0.26636</b>      |
| <b>Std. Error of Mean</b>          | <b>0.50197</b> | <b>0.099881</b> | <b>0.090135</b> | <b>0.059224</b>     | <b>0.083702</b>     | <b>0.11912</b>      |
| <b>Relative weight of Pancreas</b> | <b>NC</b>      | <b>HFD-STD</b>  | <b>HFD-STZ</b>  | <b>HFD-500mg/kg</b> | <b>HFD-250mg/kg</b> | <b>HFD-125mg/kg</b> |
| R1                                 |                |                 |                 |                     |                     |                     |
| R2                                 | 0.75           | 0.286738351     | 0.455445545     | 0.265060241         | 0.280851064         | 0.280952381         |
| R3                                 | 0.788944724    | 0.321299639     | 0.5             | 0.276               | 0.315315315         | 0.289855072         |
| R4                                 | 0.717821782    | 0.372180451     | 0.504950495     | 0.266932271         | 0.277272727         | 0.299019608         |
| R5                                 | 0.53030303     | 0.314079422     | 0.48            | 0.298245614         | 0.286363636         | 0.275700935         |
| R5                                 | 0.703448276    | 0.320557491     | 0.5             | 0.276595745         | 0.278026906         | 0.271028037         |
| <b>Mean</b>                        | <b>0.698</b>   | <b>0.323</b>    | <b>0.488</b>    | <b>0.277</b>        | <b>0.288</b>        | <b>0.283</b>        |
| <b>Std. Deviation</b>              | <b>0.0994</b>  | <b>0.0309</b>   | <b>0.0206</b>   | <b>0.0132</b>       | <b>0.0159</b>       | <b>0.0112</b>       |
| <b>Std. Error of Mean</b>          | <b>0.0445</b>  | <b>0.0138</b>   | <b>0.00922</b>  | <b>0.0059</b>       | <b>0.00712</b>      | <b>0.00502</b>      |
| <b>Relative weight of Kidney</b>   | <b>NC</b>      | <b>HFD-STD</b>  | <b>HFD-STZ</b>  | <b>HFD-500mg/kg</b> | <b>HFD-250mg/kg</b> | <b>HFD-125mg/kg</b> |

|                           |               |               |               |               |                |               |
|---------------------------|---------------|---------------|---------------|---------------|----------------|---------------|
| R1                        | 0.52          | 0.229390681   | 0.72          | 0.389558233   | 0.387234043    | 0.423809524   |
| R2                        | 0.522613065   | 0.415162455   | 0.643564356   | 0.408         | 0.400900901    | 0.367149758   |
| R3                        | 0.50990099    | 0.436090226   | 0.66          | 0.38247012    | 0.395454545    | 0.411764706   |
| R4                        | 0.550505051   | 0.418772563   | 0.574257426   | 0.456140351   | 0.381818182    | 0.387850467   |
| R5                        | 0.744827586   | 0.3728223     | 0.62          | 0.404255319   | 0.403587444    | 0.336448598   |
| <b>Mean</b>               | <b>0.57</b>   | <b>0.374</b>  | <b>0.644</b>  | <b>0.408</b>  | <b>0.394</b>   | <b>0.385</b>  |
| <b>Std. Deviation</b>     | <b>0.0991</b> | <b>0.0844</b> | <b>0.0536</b> | <b>0.0288</b> | <b>0.00916</b> | <b>0.035</b>  |
| <b>Std. Error of Mean</b> | <b>0.0443</b> | <b>0.0377</b> | <b>0.0239</b> | <b>0.0129</b> | <b>0.0041</b>  | <b>0.0157</b> |

**Table S13. Urine volume ml /day/100g**

|                                                      | <b>Groups</b> |                |                |                             |                             |                             |
|------------------------------------------------------|---------------|----------------|----------------|-----------------------------|-----------------------------|-----------------------------|
| <b>DAY 0</b>                                         | <b>NC</b>     | <b>HFD-STD</b> | <b>HFD-STZ</b> | <b>HFD-STZ<br/>500mg/kg</b> | <b>HFD-STZ<br/>250mg/kg</b> | <b>HFD-STZ<br/>125mg/kg</b> |
| R1                                                   | 3.7962        | 2.7639         | 2.4975         | 3.0969                      | 3.33                        | 3.33                        |
| R2                                                   | 2.7306        | 2.8971         | 2.8305         | 3.0969                      | 3.7296                      | 2.5974                      |
| R3                                                   | 2.0979        | 2.6973         | 2.7639         | 2.4975                      | 3.9294                      | 2.7306                      |
| R4                                                   | 1.9314        | 2.331          | 2.331          | 2.7639                      | 4.2624                      | 3.1635                      |
| R5                                                   | 2.331         | 3.1968         | 3.1635         | 3.1968                      | 3.9294                      | 3.3633                      |
| <b>Mean</b>                                          | <b>2.58</b>   | <b>2.78</b>    | <b>2.72</b>    | <b>2.93</b>                 | <b>3.84</b>                 | <b>3.04</b>                 |
| <b>Std. Deviation</b>                                | <b>0.744</b>  | <b>0.315</b>   | <b>0.321</b>   | <b>0.292</b>                | <b>0.342</b>                | <b>0.352</b>                |
| <b>Std. Error of<br/>Mean</b>                        | <b>0.333</b>  | <b>0.141</b>   | <b>0.143</b>   | <b>0.131</b>                | <b>0.153</b>                | <b>0.157</b>                |
| <b>DAY30th<br/>Animals on<br/>HFD-Diet</b>           | <b>NC</b>     | <b>HFD-STD</b> | <b>HFD-STZ</b> | <b>HFD-STZ<br/>500mg/kg</b> | <b>HFD-STZ<br/>250mg/kg</b> | <b>HFD-STZ<br/>125mg/kg</b> |
| R1                                                   | 5.08          | 6.4            | 6.84           | 7.4                         | 7.48                        | 7.8                         |
| R2                                                   | 4.16          | 7.16           | 6.32           | 7.12                        | 7.52                        | 7.88                        |
| R3                                                   | 4.2           | 7.2            | 7              | 7.8                         | 6.8                         | 7.96                        |
| R4                                                   | 3.8           | 7              | 6.6            | 7.56                        | 7.08                        | 8.32                        |
| R5                                                   | 2.8           | 7.4            | 7.4            | 7.96                        | 6.64                        | 8.52                        |
| <b>Mean</b>                                          | <b>4.01</b>   | <b>7.03</b>    | <b>6.83</b>    | <b>7.57</b>                 | <b>7.1</b>                  | <b>8.1</b>                  |
| <b>Std. Deviation</b>                                | <b>0.823</b>  | <b>0.381</b>   | <b>0.408</b>   | <b>0.33</b>                 | <b>0.395</b>                | <b>0.309</b>                |
| <b>Std. Error of<br/>Mean</b>                        | <b>0.368</b>  | <b>0.17</b>    | <b>0.183</b>   | <b>0.148</b>                | <b>0.176</b>                | <b>0.138</b>                |
| <b>Day 32nd<br/>(Day 3rd) post<br/>STZ induction</b> | <b>NC</b>     | <b>HFD-STD</b> | <b>HFD-STZ</b> | <b>HFD-STZ<br/>500mg/kg</b> | <b>HFD-STZ<br/>250mg/kg</b> | <b>HFD-STZ<br/>125mg/kg</b> |
| R1                                                   | 4.329         | 9              | 9.352          | 9.4                         | 9.45                        | 9.7                         |
| R2                                                   | 3.4965        | 9.3            | 9.018          | 9.25                        | 9.5                         | 9.6                         |

|                           |               |                |                |                             |                             |                             |
|---------------------------|---------------|----------------|----------------|-----------------------------|-----------------------------|-----------------------------|
| R3                        | 3.5298        | 9.4            | 10.02          | 9.5                         | 8.75                        | 9.6                         |
| R4                        | 3.4965        | 8.8            | 8.016          | 9.5                         | 9                           | 10.3                        |
| R5                        | 2.4975        | 9.5            | 7.4816         | 10                          | 8.5                         | 10.4                        |
| <b>Mean</b>               | <b>3.47</b>   | <b>9.2</b>     | <b>8.778</b>   | <b>9.53</b>                 | <b>9.04</b>                 | <b>9.92</b>                 |
| <b>Std. Deviation</b>     | <b>0.6497</b> | <b>0.2915</b>  | <b>1.024</b>   | <b>0.282</b>                | <b>0.435</b>                | <b>0.3962</b>               |
| <b>Std. Error of Mean</b> | <b>0.2906</b> | <b>0.1304</b>  | <b>0.4578</b>  | <b>0.1261</b>               | <b>0.1946</b>               | <b>0.1772</b>               |
| <b>Day 60th</b>           | <b>NC</b>     | <b>HFD-STD</b> | <b>HFD-STZ</b> | <b>HFD-STZ<br/>500mg/kg</b> | <b>HFD-STZ<br/>250mg/kg</b> | <b>HFD-STZ<br/>125mg/kg</b> |
| R1                        | 5.328         | 8.37           | 10.78          | 8.715                       | 8.225                       | 7.35                        |
| R2                        | 4.4955        | 8.31           | 12.18          | 8.75                        | 7.77                        | 7.245                       |
| R3                        | 4.662         | 7.98           | 11.13          | 8.785                       | 7.7                         | 7.175                       |
| R4                        | 4.1625        | 8.31           | 11.2           | 7.98                        | 7.7                         | 7.14                        |
| R5                        | 3.33          | 8.61           | 10.29          | 8.225                       | 7.805                       | 7.49                        |
| <b>Mean</b>               | <b>4.396</b>  | <b>8.316</b>   | <b>11.12</b>   | <b>8.491</b>                | <b>8.96</b>                 | <b>8.736</b>                |
| <b>Std. Deviation</b>     | <b>0.7315</b> | <b>0.2249</b>  | <b>0.6954</b>  | <b>0.3659</b>               | <b>0.2514</b>               | <b>0.1706</b>               |
| <b>Std. Error of Mean</b> | <b>0.3271</b> | <b>0.1006</b>  | <b>0.311</b>   | <b>0.1636</b>               | <b>0.1124</b>               | <b>0.0763</b>               |

**Table S14. Urine Creatinine (mg/dl)**

| <b>DAY 0</b>                                      | <b>NC</b>     | <b>HFD-STD</b> | <b>HFD-STZ</b> | <b>HFD-STZ<br/>500mg/kg</b> | <b>HFD-STZ<br/>250mg/kg</b> | <b>HFD-STZ<br/>125mg/kg</b> |
|---------------------------------------------------|---------------|----------------|----------------|-----------------------------|-----------------------------|-----------------------------|
| <b>R1</b>                                         | 97.32         | 91.2           | 91.2           | 97.4                        | 94.2                        | 80                          |
| <b>R2</b>                                         | 95.2          | 94             | 91.5           | 95.2                        | 96.2                        | 95                          |
| <b>R3</b>                                         | 96.3          | 93.2           | 92             | 99.6                        | 95                          | 98.5                        |
| <b>R4</b>                                         | 98.2          | 91.2           | 96.3           | 97.4                        | 96.1                        | 96.2                        |
| <b>R5</b>                                         | 97.5          | 90.5           | 95             | 98.6                        | 96.5                        | 94.2                        |
| <b>Mean</b>                                       | <b>96.9</b>   | <b>92.02</b>   | <b>93.2</b>    | <b>97.64</b>                | <b>95.6</b>                 | <b>92.78</b>                |
| <b>Std. Deviation</b>                             | <b>1.17</b>   | <b>1.497</b>   | <b>2.301</b>   | <b>1.646</b>                | <b>0.967</b>                | <b>7.326</b>                |
| <b>Std. Error of<br/>Mean</b>                     | <b>0.5233</b> | <b>0.6696</b>  | <b>1.029</b>   | <b>0.7359</b>               | <b>0.4324</b>               | <b>3.276</b>                |
| <b>DAY30th<br/>before STZ<br/>induction</b>       | <b>NC</b>     | <b>HFD-STD</b> | <b>HFD-STZ</b> | <b>HFD-STZ<br/>500mg/kg</b> | <b>HFD-STZ<br/>250mg/kg</b> | <b>HFD-STZ<br/>125mg/kg</b> |
| <b>R1</b>                                         | 97.32         | 91.2           | 91.2           | 97.4                        | 94.2                        | 80                          |
| <b>R2</b>                                         | 95.2          | 95.2           | 91.5           | 95.2                        | 96.2                        | 95                          |
| <b>R3</b>                                         | 96.3          | 91.2           | 93             | 97.4                        | 95                          | 98.5                        |
| <b>R4</b>                                         | 98.2          | 91.2           | 96.3           | 97.4                        | 96.1                        | 94.2                        |
| <b>R5</b>                                         | 97.5          | 90.5           | 95             | 98.6                        | 95.2                        | 94.2                        |
| <b>Mean</b>                                       | <b>96.9</b>   | <b>91.9</b>    | <b>93.4</b>    | <b>97.2</b>                 | <b>95.3</b>                 | <b>92.4</b>                 |
| <b>Std. Deviation</b>                             | <b>1.17</b>   | <b>1.89</b>    | <b>2.21</b>    | <b>1.23</b>                 | <b>0.829</b>                | <b>7.15</b>                 |
| <b>Std. Error of<br/>Mean</b>                     | <b>0.523</b>  | <b>0.846</b>   | <b>0.989</b>   | <b>0.551</b>                | <b>0.371</b>                | <b>3.2</b>                  |
| <b>DAY32th<br/>Day 3 (Post<br/>STZ Induction)</b> | <b>NC</b>     | <b>HFD-STD</b> | <b>HFD-STZ</b> | <b>HFD-STZ<br/>500mg/kg</b> | <b>HFD-STZ<br/>250mg/kg</b> | <b>HFD-STZ<br/>125mg/kg</b> |
| <b>R1</b>                                         | 96.32         | 81             | 16.2           | 16.2                        | 15.2                        | 16.2                        |
| <b>R2</b>                                         | 95.2          | 85             | 17.3           | 17.3                        | 17.3                        | 17.3                        |
| <b>R3</b>                                         | 96.3          | 82             | 15.5           | 15.2                        | 15.5                        | 14.5                        |
| <b>R4</b>                                         | 97.2          | 84             | 14.8           | 14.8                        | 14.8                        | 16.8                        |
| <b>R5</b>                                         | 97.5          | 83             | 18.2           | 19.2                        | 18.2                        | 15.2                        |



|                           |              |                |                |                             |                             |                             |
|---------------------------|--------------|----------------|----------------|-----------------------------|-----------------------------|-----------------------------|
| <b>Mean</b>               | <b>96.5</b>  | <b>83</b>      | <b>16.4</b>    | <b>16.5</b>                 | <b>16.2</b>                 | <b>16</b>                   |
| <b>Std. Deviation</b>     | <b>0.902</b> | <b>1.58</b>    | <b>1.37</b>    | <b>1.77</b>                 | <b>1.47</b>                 | <b>1.15</b>                 |
| <b>Std. Error of Mean</b> | <b>0.403</b> | <b>0.707</b>   | <b>0.611</b>   | <b>0.793</b>                | <b>0.658</b>                | <b>0.513</b>                |
| <b>Day 60th</b>           | <b>NC</b>    | <b>HFD-STD</b> | <b>HFD-STZ</b> | <b>HFD-STZ<br/>500mg/kg</b> | <b>HFD-STZ<br/>250mg/kg</b> | <b>HFD-STZ<br/>125mg/kg</b> |
| <b>R1</b>                 | 96.32        | 84.2           | 16.2           | 67.2                        | 41.2                        | 32.5                        |
| <b>R2</b>                 | 95.2         | 83.01          | 17.3           | 65.3                        | 45.6                        | 31.5                        |
| <b>R3</b>                 | 96.3         | 81.2           | 15.5           | 66.1                        | 44.2                        | 40.2                        |
| <b>R4</b>                 | 97.2         | 85.5           | 14.8           | 69.2                        | 48.9                        | 41.5                        |
| <b>R5</b>                 | 97.5         | 83.2           | 18.2           | 70.1                        | 50.1                        | 37.5                        |
| <b>Mean</b>               | <b>96.5</b>  | <b>83.4</b>    | <b>16.4</b>    | <b>67.6</b>                 | <b>46</b>                   | <b>36.6</b>                 |
| <b>Std. Deviation</b>     | <b>0.902</b> | <b>1.59</b>    | <b>1.37</b>    | <b>2.03</b>                 | <b>3.59</b>                 | <b>4.49</b>                 |
| <b>Std. Error of Mean</b> | <b>0.403</b> | <b>0.71</b>    | <b>0.611</b>   | <b>0.909</b>                | <b>1.61</b>                 | <b>2.01</b>                 |

**Table S15. Urinary Urea: (mg/dl)**

|                                          |               |                |                     |                             |                                  |                             |
|------------------------------------------|---------------|----------------|---------------------|-----------------------------|----------------------------------|-----------------------------|
| <b>DAY 0</b>                             | <b>NC</b>     | <b>HFD-STD</b> | <b>HFD-<br/>STZ</b> | <b>HFD-STZ<br/>500mg/kg</b> | <b>HFD-<br/>STZ<br/>250mg/kg</b> | <b>HFD-STZ<br/>125mg/kg</b> |
| <b>R1</b>                                | 2.79          | 2.77           | 2.77                | 2.77                        | 2.77                             | 2.77                        |
| <b>R2</b>                                | 2.9           | 2.74           | 2.74                | 2.74                        | 2.74                             | 2.74                        |
| <b>R3</b>                                | 2.8           | 2.68           | 2.68                | 2.65                        | 2.66                             | 2.67                        |
| <b>R4</b>                                | 2.74          | 2.65           | 2.65                | 2.69                        | 2.64                             | 2.63                        |
| <b>R5</b>                                | 2.87          | 2.64           | 2.64                | 2.64                        | 2.64                             | 2.64                        |
| <b>Mean</b>                              | <b>2.82</b>   | <b>2.7</b>     | <b>2.7</b>          | <b>2.7</b>                  | <b>2.69</b>                      | <b>2.69</b>                 |
| <b>Std. Deviation</b>                    | <b>0.0644</b> | <b>0.0568</b>  | <b>0.0568</b>       | <b>0.0563</b>               | <b>0.0608</b>                    | <b>0.062</b>                |
| <b>Std. Error of Mean</b>                | <b>0.0288</b> | <b>0.0254</b>  | <b>0.0254</b>       | <b>0.0252</b>               | <b>0.0272</b>                    | <b>0.0277</b>               |
| <b>DAY 30th before STZ<br/>induction</b> | <b>NC</b>     | <b>HFD-STD</b> | <b>HFD-<br/>STZ</b> | <b>HFD-STZ<br/>500mg/kg</b> | <b>HFD-<br/>STZ<br/>250mg/kg</b> | <b>HFD-STZ<br/>125mg/kg</b> |

|                                                      |                |                |                     |                             |                                  |                             |
|------------------------------------------------------|----------------|----------------|---------------------|-----------------------------|----------------------------------|-----------------------------|
| <b>R1</b>                                            | 2.74           | 2.69           | 2.78                | 2.71                        | 2.71                             | 2.71                        |
| <b>R2</b>                                            | 2.71           | 2.7            | 2.71                | 2.74                        | 2.74                             | 2.72                        |
| <b>R3</b>                                            | 2.73           | 2.74           | 2.7                 | 2.75                        | 2.71                             | 2.75                        |
| <b>R4</b>                                            | 2.72           | 2.76           | 2.74                | 2.78                        | 2.78                             | 2.74                        |
| <b>R5</b>                                            | 2.71           | 2.73           | 2.73                | 2.74                        | 2.73                             | 2.74                        |
| <b>Mean</b>                                          | <b>2.72</b>    | <b>2.72</b>    | <b>2.73</b>         | <b>2.74</b>                 | <b>2.73</b>                      | <b>2.73</b>                 |
| <b>Std. Deviation</b>                                | <b>0.013</b>   | <b>0.0288</b>  | <b>0.0311</b>       | <b>0.0251</b>               | <b>0.0288</b>                    | <b>0.0164</b>               |
| <b>Std. Error of Mean</b>                            | <b>0.00583</b> | <b>0.0129</b>  | <b>0.0139</b>       | <b>0.0112</b>               | <b>0.0129</b>                    | <b>0.00735</b>              |
| <b>Day 32nd<br/>(Day 3rd) post STZ<br/>induction</b> | NC             | <b>HFD-STD</b> | <b>HFD-<br/>STZ</b> | <b>HFD-STZ<br/>500mg/kg</b> | <b>HFD-<br/>STZ<br/>250mg/kg</b> | <b>HFD-STZ<br/>125mg/kg</b> |
| <b>R1</b>                                            | 2.74           | 0.61           | 0.63                | 0.63                        | 0.64                             | 0.62                        |
| <b>R2</b>                                            | 2.5            | 0.62           | 0.62                | 0.64                        | 0.62                             | 0.62                        |
| <b>R3</b>                                            | 2.73           | 0.67           | 0.64                | 0.64                        | 0.67                             | 0.66                        |
| <b>R4</b>                                            | 2.72           | 0.64           | 0.64                | 0.65                        | 0.64                             | 0.74                        |
| <b>R5</b>                                            | 2.71           | 0.68           | 0.68                | 0.66                        | 0.61                             | 0.68                        |
| <b>Mean</b>                                          | <b>2.68</b>    | <b>0.644</b>   | <b>0.642</b>        | <b>0.644</b>                | <b>0.636</b>                     | <b>0.664</b>                |
| <b>Std. Deviation</b>                                | <b>0.101</b>   | <b>0.0305</b>  | <b>0.0228</b>       | <b>0.0114</b>               | <b>0.023</b>                     | <b>0.0498</b>               |
| <b>Std. Error of Mean</b>                            | <b>0.0453</b>  | <b>0.0136</b>  | <b>0.0102</b>       | <b>0.0051</b>               | <b>0.0103</b>                    | <b>0.0223</b>               |
| <b>DAY 47th ( DAY 15th<br/>after STZ induction)</b>  | NC             | <b>HFD-STD</b> | <b>HFD-<br/>STZ</b> | <b>HFD-STZ<br/>500mg/kg</b> | <b>HFD-<br/>STZ<br/>250mg/kg</b> | <b>HFD-STZ<br/>125mg/kg</b> |
| <b>R1</b>                                            | 2.74           | 0.62           | 1.65                | 1                           | 0.78                             | 0.63                        |
| <b>R2</b>                                            | 2.5            | 0.63           | 1.55                | 1.5                         | 0.74                             | 0.68                        |
| <b>R3</b>                                            | 2.73           | 0.69           | 1.8                 | 1.4                         | 0.75                             | 0.7                         |
| <b>R4</b>                                            | 2.72           | 0.66           | 1.9                 | 1.3                         | 0.98                             | 0.74                        |
| <b>R5</b>                                            | 2.71           | 0.67           | 2                   | 1.2                         | 0.99                             | 0.8                         |
| <b>Mean</b>                                          | <b>2.68</b>    | <b>0.654</b>   | <b>1.78</b>         | <b>1.28</b>                 | <b>0.848</b>                     | <b>0.71</b>                 |
| <b>Std. Deviation</b>                                | <b>0.101</b>   | <b>0.0288</b>  | <b>0.182</b>        | <b>0.192</b>                | <b>0.126</b>                     | <b>0.064</b>                |
| <b>Std. Error of Mean</b>                            | <b>0.0453</b>  | <b>0.0129</b>  | <b>0.0815</b>       | <b>0.086</b>                | <b>0.0563</b>                    | <b>0.0286</b>               |

| <b>Day 60th</b>           | <b>NC</b>     | <b>HFD-STD</b> | <b>HFD-STZ</b> | <b>HFD-STZ<br/>500mg/kg</b> | <b>HFD-STZ<br/>250mg/kg</b> | <b>HFD-STZ<br/>125mg/kg</b> |
|---------------------------|---------------|----------------|----------------|-----------------------------|-----------------------------|-----------------------------|
| <b>R1</b>                 | 2.74          | 0.65           | 2.36           | 2                           | 1.98                        | 1.74                        |
| <b>R2</b>                 | 2.5           | 0.58           | 2.35           | 2.24                        | 1.88                        | 1.75                        |
| <b>R3</b>                 | 2.73          | 0.61           | 2.4            | 2.17                        | 1.78                        | 1.78                        |
| <b>R4</b>                 | 2.72          | 0.71           | 2.41           | 2.12                        | 1.91                        | 1.72                        |
| <b>R5</b>                 | 2.71          | 0.69           | 2.38           | 2.14                        | 1.89                        | 1.71                        |
| <b>Mean</b>               | <b>2.68</b>   | <b>0.648</b>   | <b>2.38</b>    | <b>2.13</b>                 | <b>1.89</b>                 | <b>1.74</b>                 |
| <b>Std. Deviation</b>     | <b>0.101</b>  | <b>0.054</b>   | <b>0.0255</b>  | <b>0.0876</b>               | <b>0.0719</b>               | <b>0.0274</b>               |
| <b>Std. Error of Mean</b> | <b>0.0453</b> | <b>0.0242</b>  | <b>0.0114</b>  | <b>0.0392</b>               | <b>0.0322</b>               | <b>0.0122</b>               |

**Oxidative stress biomarkers**

**Table S16. MDA content (nmol/mgprot)**

| <b>Tissue MDA content<br/>(nmol/mgprot)</b> | <b>NC</b>     | <b>HFD-<br/>STD</b> | <b>HFD-<br/>STZ</b> | <b>HFD-<br/>500mg/kg</b> | <b>HFD-<br/>250mg/kg</b> | <b>HFD-<br/>125mg/kg</b> |
|---------------------------------------------|---------------|---------------------|---------------------|--------------------------|--------------------------|--------------------------|
| <b>Pancreas</b>                             |               |                     |                     |                          |                          |                          |
| <b>R1</b>                                   | 2.21          | 2.3                 | 3.98                | 2.45                     | 2.47                     | 2.45                     |
| <b>R2</b>                                   | 2.23          | 2.3                 | 3.98                | 2.45                     | 2.5                      | 2.45                     |
| <b>R3</b>                                   | 2.22          | 2.32                | 3.99                | 2.43                     | 2.49                     | 2.59                     |
| <b>R4</b>                                   | 2.21          | 2.31                | 3.97                | 2.41                     | 2.45                     | 2.5                      |
| <b>R5</b>                                   | 2.2           | 2.36                | 4.05                | 2.4                      | 2.47                     | 2.41                     |
| <b>Mean</b>                                 | <b>2.21</b>   | <b>2.32</b>         | <b>3.99</b>         | <b>2.48</b>              | <b>2.48</b>              | <b>2.43</b>              |
| <b>Std. Deviation</b>                       | <b>0.0114</b> | <b>0.0249</b>       | <b>0.0321</b>       | <b>0.0693</b>            | <b>0.0195</b>            | <b>0.0228</b>            |
| <b>Std. Error of Mean</b>                   | <b>0.0051</b> | <b>0.0111</b>       | <b>0.0144</b>       | <b>0.031</b>             | <b>0.00872</b>           | <b>0.0102</b>            |
| <b>Liver</b>                                |               |                     |                     |                          |                          |                          |
| <b>R1</b>                                   | 3.37          | 3.69                | 5.84                | 3.68                     | 3.77                     | 3.77                     |
| <b>R2</b>                                   | 3.27          | 3.66                | 5.67                | 3.67                     | 3.67                     | 3.69                     |
| <b>R3</b>                                   | 3.3           | 3.56                | 5.69                | 3.69                     | 3.74                     | 3.74                     |
| <b>R4</b>                                   | 3.35          | 3.45                | 5.6                 | 3.6                      | 3.79                     | 3.79                     |
| <b>R5</b>                                   | 3.34          | 3.55                | 4.99                | 3.62                     | 3.89                     | 3.9                      |
| <b>Mean</b>                                 | <b>3.33</b>   | <b>3.58</b>         | <b>5.56</b>         | <b>3.65</b>              | <b>3.77</b>              | <b>3.78</b>              |
| <b>Std. Deviation</b>                       | <b>0.0404</b> | <b>0.0958</b>       | <b>0.329</b>        | <b>0.0396</b>            | <b>0.0801</b>            | <b>0.0779</b>            |
| <b>Std. Error of Mean</b>                   | <b>0.0181</b> | <b>0.0428</b>       | <b>0.147</b>        | <b>0.0177</b>            | <b>0.0358</b>            | <b>0.0348</b>            |
| <b>Kidney</b>                               |               |                     |                     |                          |                          |                          |
| <b>R1</b>                                   | 1.43          | 1.56                | 3.74                | 1.96                     | 2.51                     | 2.93                     |
| <b>R2</b>                                   | 1.44          | 1.54                | 3.76                | 1.98                     | 2.67                     | 2                        |
| <b>R3</b>                                   | 1.42          | 1.51                | 3.74                | 1.97                     | 2.69                     | 1.99                     |
| <b>R4</b>                                   | 1.45          | 1.49                | 3.77                | 1.95                     | 3                        | 2.32                     |
| <b>R5</b>                                   | 1.48          | 1.53                | 3.79                | 1.92                     | 2.7                      | 2.96                     |
| <b>Mean</b>                                 | <b>1.44</b>   | <b>1.53</b>         | <b>3.76</b>         | <b>1.96</b>              | <b>2.71</b>              | <b>2.44</b>              |
| <b>Std. Deviation</b>                       | <b>0.023</b>  | <b>0.027</b>        | <b>0.0212</b>       | <b>0.023</b>             | <b>0.178</b>             | <b>0.48</b>              |
| <b>Std. Error of Mean</b>                   | <b>0.0103</b> | <b>0.0121</b>       | <b>0.00949</b>      | <b>0.0103</b>            | <b>0.0794</b>            | <b>0.215</b>             |

|                             |               |               |               |               |               |               |
|-----------------------------|---------------|---------------|---------------|---------------|---------------|---------------|
| <b>Blood Serum(nmol/ml)</b> |               |               |               |               |               |               |
| <b>R1</b>                   | 2.28          | 2.57          | 5.9375        | 2.79          | 4.5           | 3.98          |
| <b>R2</b>                   | 2.28          | 2.98          | 5.6           | 2.99          | 4.3           | 3.99          |
| <b>R3</b>                   | 2.38          | 2.91          | 5.4           | 3.15          | 3.98          | 4.07          |
| <b>R4</b>                   | 2.34          | 2.8           | 5.67          | 3.16          | 4.12          | 3.99          |
| <b>R5</b>                   | 2.35          | 2.95          | 5.62          | 3.06          | 4.15          | 4.08          |
| <b>Mean</b>                 | <b>2.33</b>   | <b>2.84</b>   | <b>5.65</b>   | <b>3.03</b>   | <b>4.21</b>   | <b>4.02</b>   |
| <b>Std. Deviation</b>       | <b>0.0445</b> | <b>0.167</b>  | <b>0.193</b>  | <b>0.151</b>  | <b>0.198</b>  | <b>0.0487</b> |
| <b>Std. Error of Mean</b>   | <b>0.0199</b> | <b>0.0745</b> | <b>0.0863</b> | <b>0.0676</b> | <b>0.0885</b> | <b>0.0218</b> |

**Table S17. SOD Activity50μL(U/mg Protein)**

| <b>SOD Activity<br/>50µL<br/>(U/mg Protein)</b> | <b>NC</b>   | <b>HFD-<br/>STD</b> | <b>HFD-<br/>STZ</b> | <b>HFD-STZ<br/>500mg/kg</b> | <b>HFD-STZ<br/>250mg/kg</b> | <b>HFD-STZ<br/>1250mg/kg</b> |
|-------------------------------------------------|-------------|---------------------|---------------------|-----------------------------|-----------------------------|------------------------------|
| <b>R1</b>                                       | 350.7       | 210.7               | 85.9                | 198.05                      | 161.2                       | 155.08                       |
| <b>R2</b>                                       | 363.7       | 250.9               | 100.2               | 197.54                      | 170.5                       | 132.06                       |
| <b>R3</b>                                       | 350.7       | 223.5               | 110.2               | 214.57                      | 166.8                       | 123.05                       |
| <b>R4</b>                                       | 309.2       | 245.5               | 90.28               | 207.24                      | 155                         | 144.07                       |
| <b>R5</b>                                       | 310.5       | 275.5               | 11.9                | 200.7                       | 165.2                       | 121.09                       |
| <b>Mean</b>                                     | <b>337</b>  | <b>241</b>          | <b>79.7</b>         | <b>204</b>                  | <b>164</b>                  | <b>135</b>                   |
| <b>Std. Deviation</b>                           | <b>25.3</b> | <b>25.2</b>         | <b>39</b>           | <b>7.24</b>                 | <b>5.92</b>                 | <b>14.4</b>                  |
| <b>Std. Error of Mean</b>                       | <b>11.3</b> | <b>11.3</b>         | <b>17.5</b>         | <b>3.24</b>                 | <b>2.65</b>                 | <b>6.44</b>                  |
| <b>R1</b>                                       | 315.2       | 306.32              | 127.33              | 278.9                       | 250.2                       | 235.3                        |
| <b>R2</b>                                       | 396.91      | 307.6               | 123.89              | 265.09                      | 245.2                       | 255.1                        |
| <b>R3</b>                                       | 352.6       | 309.41              | 177.8               | 287.9                       | 223.3                       | 200.6                        |
| <b>R4</b>                                       | 389.27      | 370.16              | 178.5               | 352.6                       | 256.3                       | 19035                        |
| <b>R5</b>                                       | 390.2       | 350.16              | 150.32              | 386.9                       | 259.6                       | 167.08                       |
| <b>Mean</b>                                     | <b>369</b>  | <b>329</b>          | <b>152</b>          | <b>314</b>                  | <b>247</b>                  | <b>210</b>                   |
| <b>Std. Deviation</b>                           | <b>34.7</b> | <b>29.6</b>         | <b>26.3</b>         | <b>52.7</b>                 | <b>14.3</b>                 | <b>35.3</b>                  |
| <b>Std. Error of Mean</b>                       | <b>15.5</b> | <b>13.2</b>         | <b>11.8</b>         | <b>23.6</b>                 | <b>6.4</b>                  | <b>15.8</b>                  |
| <b>R1</b>                                       | 280.53      | 218.97              | 87.92               | 203.4                       | 95.8                        | 88.21                        |
| <b>R2</b>                                       | 283.89      | 236.9               | 65.9                | 241.03                      | 90.3                        | 83.7                         |
| <b>R3</b>                                       | 300.09      | 220.07              | 64.1                | 188.03                      | 85.6                        | 82.6                         |
| <b>R4</b>                                       | 290.36      | 223.6               | 70.5                | 224.6                       | 95.3                        | 78.5                         |
| <b>R5</b>                                       | 290.6       | 252.6               | 70.6                | 198.7                       | 92.6                        | 89.6                         |
| <b>Mean</b>                                     | <b>289</b>  | <b>230</b>          | <b>71.8</b>         | <b>211</b>                  | <b>91.9</b>                 | <b>84.5</b>                  |
| <b>Std. Deviation</b>                           | <b>7.5</b>  | <b>14.3</b>         | <b>9.45</b>         | <b>21.4</b>                 | <b>4.17</b>                 | <b>4.47</b>                  |
| <b>Std. Error of Mean</b>                       | <b>3.36</b> | <b>6.4</b>          | <b>4.23</b>         | <b>9.55</b>                 | <b>1.86</b>                 | <b>2</b>                     |
| <b>R1</b>                                       | 300.96      | 298.93              | 142.51              | 288.6                       | 228.6                       | 174.86                       |
| <b>R2</b>                                       | 312.8       | 299.9               | 141.46              | 279.8                       | 245                         | 123                          |
| <b>R3</b>                                       | 380.9       | 300.8               | 131.2               | 300.8                       | 250.8                       | 194.6                        |

|                           |             |             |             |             |             |             |
|---------------------------|-------------|-------------|-------------|-------------|-------------|-------------|
| <b>R4</b>                 | 286.5       | 287.6       | 135.6       | 280.65      | 229.7       | 165.6       |
| <b>R5</b>                 | 285.5       | 277.6       | 139.6       | 275.5       | 267.9       | 144.6       |
| <b>Mean</b>               | <b>313</b>  | <b>293</b>  | <b>138</b>  | <b>285</b>  | <b>244</b>  | <b>161</b>  |
| <b>Std. Deviation</b>     | <b>39.4</b> | <b>10.1</b> | <b>4.66</b> | <b>9.98</b> | <b>16.3</b> | <b>27.6</b> |
| <b>Std. Error of Mean</b> | <b>17.6</b> | <b>4.53</b> | <b>2.08</b> | <b>4.47</b> | <b>7.28</b> | <b>12.4</b> |

**Table S18. T.AOC Activity U/mg**

| <b>T.AOC Activity (U/mg)</b> | <b>NC</b>     | <b>HFD-STD</b> | <b>HFD-STZ</b> | <b>HFD-500mg/kg</b> | <b>HFD-250mg/kg</b> | <b>HFD-125mg/kg</b> |
|------------------------------|---------------|----------------|----------------|---------------------|---------------------|---------------------|
| <b>Tissue</b>                |               |                |                |                     |                     |                     |
| <b>Pancreas</b>              |               |                |                |                     |                     |                     |
| <b>R1</b>                    | 2.76          | 2.56           | 0.9            | 2.51                | 2.02                | 1.23                |
| <b>R2</b>                    | 2.8           | 2.53           | 1.2            | 2.4                 | 2.1                 | 1.25                |
| <b>R3</b>                    | 2.83          | 2.59           | 1.3            | 2.47                | 2.11                | 1.67                |
| <b>R4</b>                    | 2.85          | 2.45           | 0.89           | 2.5                 | 2.34                | 1.3                 |
| <b>R5</b>                    | 2.81          | 2.5            | 1.4            | 2.52                | 2.4                 | 1.27                |
| <b>Mean</b>                  | <b>2.81</b>   | <b>2.526</b>   | <b>1.138</b>   | <b>2.48</b>         | <b>2.194</b>        | <b>1.344</b>        |
| <b>Std. Deviation</b>        | <b>0.0339</b> | <b>0.05413</b> | <b>0.2329</b>  | <b>0.04848</b>      | <b>0.1658</b>       | <b>0.1841</b>       |
| <b>Std. Error of Mean</b>    | <b>0.0152</b> | <b>0.02421</b> | <b>0.1041</b>  | <b>0.02168</b>      | <b>0.07414</b>      | <b>0.08232</b>      |
| <b>Liver</b>                 |               |                |                |                     |                     |                     |
| <b>R1</b>                    | 3.36          | 2.32           | 1.6            | 2.61                | 2.12                | 2.02                |
| <b>R2</b>                    | 3.39          | 2.14           | 1.4            | 2.45                | 2.13                | 2.05                |
| <b>R3</b>                    | 3.56          | 2.39           | 1.3            | 2.53                | 2.22                | 1.98                |
| <b>R4</b>                    | 3.45          | 2.45           | 1.23           | 2.59                | 2.17                | 1.86                |
| <b>R5</b>                    | 3.65          | 2.56           | 1.09           | 2.56                | 2.15                | 1.71                |
| <b>Mean</b>                  | <b>3.48</b>   | <b>2.37</b>    | <b>1.32</b>    | <b>2.55</b>         | <b>2.16</b>         | <b>1.92</b>         |
| <b>Std. Deviation</b>        | <b>0.121</b>  | <b>0.157</b>   | <b>0.191</b>   | <b>0.0626</b>       | <b>0.0396</b>       | <b>0.14</b>         |

|                             |               |               |                |               |               |               |
|-----------------------------|---------------|---------------|----------------|---------------|---------------|---------------|
| <b>Std. Error of Mean</b>   | <b>0.0542</b> | <b>0.0701</b> | <b>0.0855</b>  | <b>0.028</b>  | <b>0.0177</b> | <b>0.0625</b> |
| <b>Kidney</b>               |               |               |                |               |               |               |
| <b>R1</b>                   | 2.4           | 1.7           | 0.4822         | 1.5           | 0.32          | 1.59          |
| <b>R2</b>                   | 2.5           | 2.09          | 0.47           | 1.56          | 1.32          | 1.24          |
| <b>R3</b>                   | 2.56          | 1.76          | 0.43           | 1.532         | 1.25          | 1.02          |
| <b>R4</b>                   | 2.55          | 2.09          | 0.44           | 1.532         | 1.2           | 1.09          |
| <b>R5</b>                   | 2.32          | 1.89          | 0.47           | 1.576         | 1.02          | 1.07          |
| <b>Mean</b>                 | <b>2.47</b>   | <b>1.91</b>   | <b>0.458</b>   | <b>1.54</b>   | <b>1.02</b>   | <b>1.2</b>    |
| <b>Std. Deviation</b>       | <b>0.103</b>  | <b>0.181</b>  | <b>0.0223</b>  | <b>0.0293</b> | <b>0.408</b>  | <b>0.232</b>  |
| <b>Std. Error of Mean</b>   | <b>0.0462</b> | <b>0.0812</b> | <b>0.00995</b> | <b>0.0131</b> | <b>0.182</b>  | <b>0.104</b>  |
| <b>Blood Serum(nmol/ml)</b> |               |               |                |               |               |               |
| <b>R1</b>                   | 95.805        | 69.106        | 23.014         | 56.24U/ml     | 56.795        | 46.188        |
| <b>R2</b>                   | 95.805        | 79.1066       | 23.014         | 57.288        | 56.425        | 45.2          |
| <b>R3</b>                   | 83            | 88.366        | 23.014         | 56            | 50.3          | 46.6          |
| <b>R4</b>                   | 83.225        | 79.106        | 23.754         | 55.5          | 56.425        | 47.8          |
| <b>R5</b>                   | 71.237        | 77.2          | 26.0233        | 56.24U/ml     | 57.288        | 46.7          |
| <b>Mean</b>                 | <b>78.6</b>   | <b>85.8</b>   | <b>23.8</b>    | <b>56.3</b>   | <b>55.4</b>   | <b>46.5</b>   |
| <b>Std. Deviation</b>       | <b>6.86</b>   | <b>10.3</b>   | <b>1.3</b>     | <b>0.652</b>  | <b>2.9</b>    | <b>0.939</b>  |
| <b>Std. Error of Mean</b>   | <b>3.07</b>   | <b>4.62</b>   | <b>0.583</b>   | <b>0.292</b>  | <b>1.3</b>    | <b>0.42</b>   |

**Table S19. Serum G6PD Conc. %**

| <b>Serum G6PD Conc. %</b> | <b>NC</b> | <b>HFD-STD</b> | <b>HFD-STZ</b> | <b>HFD-500mg/kg</b> | <b>HFD-250mg/kg</b> | <b>HFD-125mg/kg</b> |
|---------------------------|-----------|----------------|----------------|---------------------|---------------------|---------------------|
| <b>R1</b>                 | 88%       | 80%            | 24%            | 79                  | 69%                 | 65%                 |
| <b>R2</b>                 | 80%       | 84%            | 25%            | 78                  | 70%                 | 67%                 |
| <b>R3</b>                 | 85%       | 83%            | 26%            | 80                  | 72%                 | 69%                 |
| <b>R4</b>                 | 80%       | 79%            | 27%            | 77                  | 71%                 | 68%                 |
| <b>R5</b>                 | 84%       | 83%            | 25%            | 81                  | 73%                 | 66%                 |



|                           |             |             |             |              |              |              |
|---------------------------|-------------|-------------|-------------|--------------|--------------|--------------|
| <b>Mean</b>               | <b>83.4</b> | <b>81.8</b> | <b>25.4</b> | <b>79</b>    | <b>71</b>    | <b>67</b>    |
| <b>Std. Deviation</b>     | <b>3.44</b> | <b>2.17</b> | <b>1.14</b> | <b>1.58</b>  | <b>1.58</b>  | <b>1.58</b>  |
| <b>Std. Error of Mean</b> | <b>1.54</b> | <b>0.97</b> | <b>0.51</b> | <b>0.707</b> | <b>0.707</b> | <b>0.707</b> |

**Table S20. GSH-ST Activity (U/mg protein)**

| <b>GSH-ST Activity<br/>(U/mg protein)</b> | <b>NC</b>     | <b>HFD-<br/>STD</b> | <b>HFD-<br/>STZ</b> | <b>HFD-<br/>500mg/kg</b> | <b>HFD-<br/>250mg/kg</b> | <b>HFD-125mg/kg</b> |
|-------------------------------------------|---------------|---------------------|---------------------|--------------------------|--------------------------|---------------------|
| <b>Pancreas</b>                           | 8.276         | 6.5356              | 4.19                | 5.312                    | 5.234                    | 5                   |
| <b>R1</b>                                 | 8.2           | 6                   | 4.09                | 5.98                     | 5.3                      | 5.09                |
| <b>R2</b>                                 | 8.9           | 6.7                 | 4.12                | 5.99                     | 5.4                      | 5.03                |
| <b>R3</b>                                 | 8.45          | 6.43                | 4.13                | 5.91                     | 5.1                      | 5.07                |
| <b>R4</b>                                 | 8.56          | 6.234               | 4.19                | 5.9                      | 5.8                      | 4.78                |
| <b>R5</b>                                 | 8.43          | 6.123               | 4.15                | 5.44                     | 5.3                      | 5.01                |
| <b>Mean</b>                               | <b>8.47</b>   | <b>6.34</b>         | <b>4.15</b>         | <b>5.76</b>              | <b>5.36</b>              | <b>5</b>            |
| <b>Std. Deviation</b>                     | <b>0.247</b>  | <b>0.265</b>        | <b>0.0399</b>       | <b>0.299</b>             | <b>0.239</b>             | <b>0.112</b>        |
| <b>Std. Error of Mean</b>                 | <b>0.101</b>  | <b>0.108</b>        | <b>0.0163</b>       | <b>0.122</b>             | <b>0.0976</b>            | <b>0.0456</b>       |
| <b>Liver</b>                              |               |                     |                     |                          |                          |                     |
| <b>R1</b>                                 | 18.276        | 16.5356             | 4.19                | 15.312                   | 15.234                   | 12                  |
| <b>R2</b>                                 | 18.23         | 17                  | 4.19                | 15.2                     | 14.99                    | 12.5                |
| <b>R3</b>                                 | 18.45         | 17.32               | 4.2                 | 15.32                    | 15.02                    | 13.5                |
| <b>R4</b>                                 | 17.9          | 16.56               | 3.98                | 15.98                    | 15.12                    | 13.9                |
| <b>R5</b>                                 | 17.99         | 16.43               | 4.12                | 15.23                    | 15.05                    | 14.03               |
| <b>Mean</b>                               | <b>18.2</b>   | <b>16.8</b>         | <b>4.14</b>         | <b>15.4</b>              | <b>15.1</b>              | <b>13.2</b>         |
| <b>Std. Deviation</b>                     | <b>0.223</b>  | <b>0.378</b>        | <b>0.0929</b>       | <b>0.324</b>             | <b>0.0973</b>            | <b>0.894</b>        |
| <b>Std. Error of Mean</b>                 | <b>0.0996</b> | <b>0.169</b>        | <b>0.0415</b>       | <b>0.145</b>             | <b>0.0435</b>            | <b>0.4</b>          |
| <b>Kidney</b>                             |               |                     |                     |                          |                          |                     |
| <b>R1</b>                                 | 8.276         | 6.5356              | 4.19                | 5.312                    | 5.234                    | 5                   |
| <b>R2</b>                                 | 8.7           | 6.9                 | 4.3                 | 5.98                     | 5.43                     | 5.4                 |
| <b>R3</b>                                 | 8.9           | 6.95                | 4.2                 | 5.78                     | 5.55                     | 5.3                 |
| <b>R4</b>                                 | 9.12          | 6.93                | 4.09                | 5.99                     | 5.08                     | 5.2                 |
| <b>R5</b>                                 | 9.01          | 7                   | 4.01                | 6                        | 5.74                     | <u>5.1</u>          |

|                               |              |                     |                     |                          |                          |                     |
|-------------------------------|--------------|---------------------|---------------------|--------------------------|--------------------------|---------------------|
| <b>Mean</b>                   | <b>8.8</b>   | <b>6.86</b>         | <b>4.16</b>         | <b>5.81</b>              | <b>5.41</b>              | <b>5.2</b>          |
| <b>Std. Deviation</b>         | <b>0.332</b> | <b>0.187</b>        | <b>0.111</b>        | <b>0.294</b>             | <b>0.259</b>             | <b>0.158</b>        |
| <b>Std. Error of Mean</b>     | <b>0.149</b> | <b>0.0835</b>       | <b>0.0497</b>       | <b>0.132</b>             | <b>0.116</b>             | <b>0.0707</b>       |
| <b>Blood Serum<br/>(U/ml)</b> | <b>NC</b>    | <b>HFD-<br/>STD</b> | <b>HFD-<br/>STZ</b> | <b>HFD-<br/>500mg/kg</b> | <b>HFD-<br/>250mg/kg</b> | <b>HFD-125mg/kg</b> |
| <b>R1</b>                     | 6.5356       | 8.276               | 4.19                | 5.312                    | 5.234                    | 5                   |
| <b>R2</b>                     | 9.56         | 8.3                 | 3.98                | 6.7                      | 5.23                     | 5.1                 |
| <b>R3</b>                     | 10.9         | 8.9                 | 3.87                | 5.98                     | 5.34                     | 5.2                 |
| <b>R4</b>                     | 9.7          | 8.23                | 3.45                | 5.14                     | 5.32                     | 4.98                |
| <b>R5</b>                     | 8.8          | 9.8                 | 3                   | 5.99                     | 5.22                     | 5                   |
| <b>Mean</b>                   | <b>9.1</b>   | <b>8.7</b>          | <b>3.7</b>          | <b>5.82</b>              | <b>5.27</b>              | <b>5.06</b>         |
| <b>Std. Deviation</b>         | <b>1.62</b>  | <b>0.673</b>        | <b>0.474</b>        | <b>0.622</b>             | <b>0.0565</b>            | <b>0.0932</b>       |
| <b>Std. Error of Mean</b>     | <b>0.724</b> | <b>0.301</b>        | <b>0.212</b>        | <b>0.278</b>             | <b>0.0253</b>            | <b>0.0417</b>       |

**Table S21. GS-PX Activity**

| <b>GS-PX Activity</b>     | <b>NC</b>      | <b>HFD-STD</b> | <b>HFD-STZ</b> | <b>HFD-500mg/kg</b> | <b>HFD-250mg/kg</b> | <b>HFD-125mg/kg</b> |
|---------------------------|----------------|----------------|----------------|---------------------|---------------------|---------------------|
| <b>Pancreas</b>           |                |                |                | <b>500</b>          | <b>250</b>          | <b>125</b>          |
| <b>R1</b>                 | 1206.44        | 1114.12        | 900.53         | 1100.03             | 1057.03             | 1092                |
| <b>R2</b>                 | 1115.3         | 1113.12        | 888.53         | 1087.03             | 1049.03             | 1093.7              |
| <b>R3</b>                 | 1233.43        | 1115.12        | 889.53         | 1110.03             | 1067.03             | 1091.5              |
| <b>R4</b>                 | 1099.44        | 1110.12        | 878.53         | 1099.03             | 1037.03             | 1092.6              |
| <b>R5</b>                 | <b>1002.43</b> | <b>1111.12</b> | <b>868.53</b>  | <b>1001.03</b>      | <b>1095.03</b>      | <b>1090.9</b>       |
| <b>Mean</b>               | <b>1131</b>    | <b>1113</b>    | <b>865</b>     | <b>1092</b>         | <b>1061</b>         | <b>1079</b>         |
| <b>Std. Deviation</b>     | <b>92.13</b>   | <b>2.074</b>   | <b>37.42</b>   | <b>1.074</b>        | <b>21.95</b>        | <b>44.58</b>        |
| <b>Std. Error of Mean</b> | <b>41.2</b>    | <b>0.9274</b>  | <b>16.74</b>   | <b>0.4802</b>       | <b>9.818</b>        | <b>19.94</b>        |
| <b>Liver</b>              | <b>NC</b>      | <b>HFD-STD</b> | <b>HFD-STZ</b> | <b>HFD-500mg/kg</b> | <b>HFD-250mg/kg</b> | <b>HFD-125mg/kg</b> |
| <b>R1</b>                 | 559.4          | 544.4          | 308.25         | 507.645             | 443.295             | 457.13              |
| <b>R2</b>                 | 558.5          | 560.5          | 400.9          | 550.9               | 504.7               | 444.9               |
| <b>R3</b>                 | 560.9          | 555.5          | 399.8          | 545.3               | 509.6               | 489.6               |
| <b>R4</b>                 | 561.2          | 558.5          | 401.6          | 509.8               | 525.8               | 445.9               |
| <b>R5</b>                 | 560.3          | 559.6          | 387.9          | 555.7               | 535.7               | 456.7               |
| <b>Mean</b>               | <b>560</b>     | <b>556</b>     | <b>380</b>     | <b>534</b>          | <b>504</b>          | <b>459</b>          |
| <b>Std. Deviation</b>     | <b>1.11</b>    | <b>6.59</b>    | <b>40.3</b>    | <b>23.3</b>         | <b>36</b>           | <b>18.1</b>         |
| <b>Std. Error of Mean</b> | <b>0.497</b>   | <b>2.95</b>    | <b>18</b>      | <b>10.4</b>         | <b>16.1</b>         | <b>8.11</b>         |
| <b>Kidney</b>             | <b>NC</b>      | <b>HFD-STD</b> | <b>HFD-STZ</b> | <b>HFD-500mg/kg</b> | <b>HFD-250mg/kg</b> | <b>HFD-125mg/kg</b> |
| <b>R1</b>                 | <b>47.01</b>   | <b>45.09</b>   | <b>23.16</b>   | <b>44.68</b>        | <b>43.32</b>        | <b>33.8</b>         |
| <b>R2</b>                 | <b>45</b>      | <b>44.3</b>    | <b>23.15</b>   | <b>40.8</b>         | <b>43.1</b>         | <b>38.5</b>         |
| <b>R3</b>                 | <b>48.9</b>    | <b>46.9</b>    | <b>30.9</b>    | <b>43.6</b>         | <b>43.2</b>         | <b>37.3</b>         |
| <b>R4</b>                 | <b>47.3</b>    | <b>45.9</b>    | <b>25.6</b>    | <b>42.7</b>         | <b>42</b>           | <b>33.6</b>         |
| <b>R5</b>                 | <b>47.1</b>    | <b>45.6</b>    | <b>20.8</b>    | <b>43.7</b>         | <b>41.9</b>         | <b>34.6</b>         |
| <b>Mean</b>               | <b>47.1</b>    | <b>45.6</b>    | <b>24.7</b>    | <b>43.1</b>         | <b>42.7</b>         | <b>35.6</b>         |
| <b>Std. Deviation</b>     | <b>1.39</b>    | <b>0.965</b>   | <b>3.85</b>    | <b>1.46</b>         | <b>0.694</b>        | <b>2.21</b>         |
| <b>Std. Error of Mean</b> | <b>0.62</b>    | <b>0.431</b>   | <b>1.72</b>    | <b>0.654</b>        | <b>0.31</b>         | <b>0.988</b>        |

| <b>Blood Serum Activity</b> | <b>NC</b>    | <b>HFD-STD</b> | <b>HFD-STZ</b> | <b>HFD-500mg/kg</b> | <b>HFD-250mg/kg</b> | <b>HFD-125mg/kg</b> |
|-----------------------------|--------------|----------------|----------------|---------------------|---------------------|---------------------|
| <b>R1</b>                   | 782.608      | 652.17         | 391.3          | 658.69              | 650.78              | 645.69              |
| <b>R2</b>                   | 402.72       | 293.52         | 289.28         | 353.65              | 362.71              | 589.9               |
| <b>R3</b>                   | 780.7        | 652.17         | 380.2          | 702.9               | 727.5               | 627.5               |
| <b>R4</b>                   | 690.7        | 652.17         | 367.2          | 687.9               | 654.5               | 580.7               |
| <b>R5</b>                   | 783.5        | 652.17         | 350.6          | 767.5               | 737.5               | 667.4               |
| <b>Mean</b>                 | <b>688</b>   | <b>580.4</b>   | <b>355.7</b>   | <b>634.1</b>        | <b>626.6</b>        | <b>622.2</b>        |
| <b>Std. Deviation</b>       | <b>164.4</b> | <b>160.4</b>   | <b>40.12</b>   | <b>161.8</b>        | <b>152.9</b>        | <b>36.7</b>         |
| <b>Std. Error of Mean</b>   | <b>73.5</b>  | <b>71.73</b>   | <b>17.94</b>   | <b>72.35</b>        | <b>68.37</b>        | <b>16.41</b>        |

**Table S22. Catalase Activity (U/g protein)**

| <b>Catalase Activity (U/g protein)</b> | <b>NC</b>    | <b>HFD-STD</b> | <b>HFD-STZ</b> | <b>HFD-500mg/kg</b> | <b>HFD-250mg/kg</b> | <b>HFD-125mg/kg</b> |
|----------------------------------------|--------------|----------------|----------------|---------------------|---------------------|---------------------|
| <b>Pancreas</b>                        |              |                |                |                     |                     |                     |
| <b>R1</b>                              | 22.9         | 20.5           | 15.3           | 18.3                | 17.6                | 16.2                |
| <b>R2</b>                              | 21.3         | 19.3           | 14.6           | 18.2                | 17.2                | 16.3                |
| <b>R3</b>                              | 22.5         | 20.3           | 10.3           | 18                  | 16                  | 15                  |
| <b>R4</b>                              | 20.4         | 19.1           | 12.4           | 18.6                | 17.9                | 16.9                |
| <b>R5</b>                              | 20.9         | 20.4           | 10.9           | 19                  | 17.7                | 16.8                |
| <b>Mean</b>                            | <b>21.6</b>  | <b>19.9</b>    | <b>12.7</b>    | <b>18.4</b>         | <b>17.3</b>         | <b>16.2</b>         |
| <b>Std. Deviation</b>                  | <b>1.06</b>  | <b>0.665</b>   | <b>2.21</b>    | <b>0.39</b>         | <b>0.76</b>         | <b>0.757</b>        |
| <b>Std. Error of Mean</b>              | <b>0.475</b> | <b>0.297</b>   | <b>0.986</b>   | <b>0.174</b>        | <b>0.34</b>         | <b>0.339</b>        |
| <b>Liver</b>                           |              |                |                |                     |                     |                     |
| <b>R1</b>                              | 501.2        | 499.2          | 272.4          | 480.2               | 402.1               | 387.3               |
| <b>R2</b>                              | 471.3        | 471.4          | 256.4          | 470.2               | 410.3               | 400.3               |
| <b>R3</b>                              | 487.2        | 470.2          | 300.4          | 465.2               | 430.2               | 400.5               |

|                                        |              |              |              |              |              |             |
|----------------------------------------|--------------|--------------|--------------|--------------|--------------|-------------|
| <b>R4</b>                              | 450.3        | 444.3        | 287.5        | 446.3        | 420.5        | 399.7       |
| <b>R5</b>                              | 473.4        | 450.2        | 212.4        | 420.5        | 404.5        | 400         |
| <b>Mean</b>                            | <b>477</b>   | <b>467</b>   | <b>266</b>   | <b>456</b>   | <b>414</b>   | <b>398</b>  |
| <b>Std. Deviation</b>                  | <b>19</b>    | <b>21.6</b>  | <b>34.1</b>  | <b>23.6</b>  | <b>11.7</b>  | <b>5.74</b> |
| <b>Std. Error of Mean</b>              | <b>8.51</b>  | <b>9.65</b>  | <b>15.3</b>  | <b>10.5</b>  | <b>5.24</b>  | <b>2.57</b> |
| <b>Kidney</b>                          |              |              |              |              |              |             |
| <b>R1</b>                              | 58.89        | 55.9         | 24.07        | 55.9         | 53.07        | 50.9        |
| <b>R2</b>                              | 60.9         | 55.4         | 23.09        | 55.07        | 52.3         | 50.2        |
| <b>R3</b>                              | 58.5         | 54.9         | 22.1         | 55,8         | 51.9         | 49.6        |
| <b>R4</b>                              | 57.5         | 56.9         | 25.9         | 55,03        | 52.5         | 48.7        |
| <b>R5</b>                              | 58.6         | 57.2         | 23.9         | 55,4         | 52.9         | 42.5        |
| <b>Mean</b>                            | <b>58.9</b>  | <b>56.1</b>  | <b>23.8</b>  | <b>55.4</b>  | <b>52.5</b>  | <b>48.4</b> |
| <b>Std. Deviation</b>                  | <b>1.25</b>  | <b>0.976</b> | <b>1.4</b>   | <b>0.402</b> | <b>0.469</b> | <b>3.38</b> |
| <b>Std. Error of Mean</b>              | <b>0.557</b> | <b>0.437</b> | <b>0.628</b> | <b>0.18</b>  | <b>0.21</b>  | <b>1.51</b> |
| <b>Hemolysate<br/>Activity (U/gHb)</b> |              |              |              |              |              |             |
| <b>R1</b>                              | 132          | 123          | 98           | 121          | 115          | 113         |
| <b>R2</b>                              | 156          | 130          | 99           | 125          | 110          | 100         |
| <b>R3</b>                              | 145          | 135          | 80           | 130          | 109          | 99          |
| <b>R4</b>                              | 210          | 139          | 97           | 137          | 112          | 102         |
| <b>R5</b>                              | 162          | 133          | 100          | 130          | 111          | 114         |
| <b>Mean</b>                            | <b>161</b>   | <b>132</b>   | <b>94.8</b>  | <b>129</b>   | <b>111</b>   | <b>106</b>  |
| <b>Std. Deviation</b>                  | <b>29.7</b>  | <b>6</b>     | <b>8.35</b>  | <b>6.02</b>  | <b>2.3</b>   | <b>7.3</b>  |
| <b>Std. Error of Mean</b>              | <b>13.3</b>  | <b>2.68</b>  | <b>3.73</b>  | <b>2.69</b>  | <b>1.03</b>  | <b>3.26</b> |
|                                        |              |              |              |              |              |             |

### Antioxidant Capacity

**Table: S23 Total phenolic contents (TPC)**

| S.no | Absorbance of hydro-methanolic extract <i>Cardamine Hirsuta</i> (Y) | $x=(y-b)/m$       |
|------|---------------------------------------------------------------------|-------------------|
| 1    | 1.67                                                                | 225.6603774       |
| 2    | 1.45                                                                | 184.1509434       |
| 3    | 1.33                                                                | 161.509434        |
|      |                                                                     | 190.4402516±32.53 |

**Table: S24 Total flavonoid contents (TFC)**

|                                                                                                  |                                                          |
|--------------------------------------------------------------------------------------------------|----------------------------------------------------------|
|                                                                                                  |                                                          |
| <b>Total Flavonoids Content</b>                                                                  | <b><math>R \times D.F \times V \times 100 / W</math></b> |
| 1                                                                                                | 4.020547945                                              |
| 2                                                                                                | 4.780821918                                              |
| 3                                                                                                | 3.45890411                                               |
| <b><math>\mu\text{g}</math> of QE/mg of hydro-methanolic extract of <i>Cardamine hirsuta</i></b> | <b>4.086757991±0.6634</b>                                |
| R - Result obtained from the standard curve                                                      |                                                          |
| D.F - Dilution factor                                                                            |                                                          |
| V - Volume of stock Solution                                                                     |                                                          |
| 100 - For 100 g dried plant                                                                      |                                                          |
| W - Weight of plant used in the experiment                                                       |                                                          |
